# Supplementary material
Source: publisher figshare collection journal article supplement (https://karger.figshare.com/articles/dataset/_/7000487)
Supplement: Supplementary file 1 [file 1]

Archive with 18 entries (18 files):
- GER491113_sm2.pdf
- GER491113_sm1.jpg
- GER491113_sm9.PDF
- GER491113_sm9.docx
- GER491113_sm8.PDF
- GER491113_sm7.PDF
- GER491113_sm7.jpg
- GER491113_sm6.PDF
- GER491113_sm6.jpg
- GER491113_sm5.PDF
- GER491113_sm5.jpg
- GER491113_sm4.PDF
- GER491113_sm4.jpg
- GER491113_sm3.PDF
- GER491113_sm2.doc
- GER491113_sm1.PDF
- GER491113_sm3.jpg
- GER491113_sm8.jpg
