# Supplementary material
Source: publisher figshare collection journal article supplement (https://karger.figshare.com/articles/dataset/_/7000487)
Supplement: Supplementary file 1 [file 1 › GER491113_sm2.pdf]

Supplementary Table. 1. Statistical data of histological analysis of staining markers in control, D-galactose, and gintonin (50 mg/kg or 100 mg/kg)-fed D-gal groups. The table includes mean, standard error of mean (SEM), *p* value, and degree of freedom. *p*-values shown in the table are obtained from post-hoc analysis using Bonferroni's multiple comparison test (n = 5 per group).

| Immunostain marker                                                               |                   | Control           | D-gal            | D-gal-GT50       | D-gal-GT100      |
|----------------------------------------------------------------------------------|-------------------|-------------------|------------------|------------------|------------------|
| Ki67 <sup>+</sup> nuclei                                                         | Mean              | 19                | 7.1              | 10.4             | 15.6             |
|                                                                                  | SEM               | 1.422             | 0.674            | 3.134            | 1.343            |
|                                                                                  | <i>p</i> value    | Control vs        | <i>P</i> < 0.001 | <i>P</i> < 0.001 | <i>P</i> > 0.05  |
|                                                                                  |                   |                   | D-gal vs         | <i>P</i> > 0.05  | <i>P</i> < 0.001 |
|                                                                                  | Degree of freedom | F (3,36) = 21.36  |                  | D-gal-GT50 vs    | <i>P</i> < 0.01  |
| DCX <sup>+</sup> cells                                                           | Mean              | 109.4             | 64.5             | 85.8             | 102.8            |
|                                                                                  | SEM               | 6.501             | 2.517            | 3.693            | 5.561            |
|                                                                                  | <i>p</i> value    | Control vs        | <i>P</i> < 0.001 | <i>P</i> < 0.01  | <i>P</i> > 0.05  |
|                                                                                  |                   |                   | D-gal vs         | <i>P</i> < 0.05  | <i>P</i> < 0.001 |
|                                                                                  | Degree of freedom | F (3,36) = 17.26  |                  | D-gal-GT50 vs    | <i>P</i> > 0.05  |
| BrdU <sup>+</sup> cells                                                          | Mean              | 10.09             | 3.54             | 6.09             | 8.27             |
|                                                                                  | SEM               | 0.928             | 0.542            | 0.517            | 1.306            |
|                                                                                  | <i>p</i> value    | Control vs        | <i>P</i> < 0.001 | <i>P</i> < 0.01  | <i>P</i> > 0.05  |
|                                                                                  |                   |                   | D-gal vs         | <i>P</i> > 0.05  | <i>P</i> < 0.01  |
|                                                                                  | Degree of freedom | F (3,40) = 12.16  |                  | D-gal-GT50 vs    | <i>P</i> > 0.05  |
| BrdU <sup>+</sup> -NeuN <sup>+</sup> cells                                       | Mean              | 5.45              | 1.63             | 3.18             | 4.27             |
|                                                                                  | SEM               | 0.845             | 0.26             | 0.3              | 0.757            |
|                                                                                  | <i>p</i> value    | Control vs        | <i>P</i> < 0.001 | <i>P</i> < 0.05  | <i>P</i> > 0.05  |
|                                                                                  |                   |                   | D-gal vs         | <i>P</i> > 0.05  | <i>P</i> < 0.05  |
|                                                                                  | Degree of freedom | F (3,40) = 8.596  |                  | D-gal-GT50 vs    | <i>P</i> > 0.05  |
| Percentage of BrdU <sup>+</sup> -NeuN <sup>+</sup> cells/BrdU <sup>+</sup> cells | Mean              | 52.34             | 49.84            | 52.96            | 51.19            |
|                                                                                  | SEM               | 6.923             | 11.073           | 7.824            | 5.905            |
|                                                                                  | <i>p</i> value    | Control vs        | <i>P</i> > 0.05  | <i>P</i> > 0.05  | <i>P</i> > 0.05  |
|                                                                                  |                   |                   | D-gal vs         | <i>P</i> > 0.05  | <i>P</i> > 0.05  |
|                                                                                  | Degree of freedom | F (3,40) = 0.1124 |                  | D-gal-GT50 vs    | <i>P</i> > 0.05  |
| pCREB <sup>+</sup> nuclei                                                        | Mean              | 20.1              | 9.7              | 15               | 19.5             |
|                                                                                  | SEM               | 1.53              | 1.38             | 0.94             | 1.24             |
|                                                                                  | <i>p</i> value    | Control vs        | <i>P</i> < 0.001 | <i>P</i> > 0.05  | <i>P</i> > 0.05  |
|                                                                                  |                   |                   | D-gal vs         | <i>P</i> < 0.05  | <i>P</i> < 0.001 |
|                                                                                  | Degree of freedom | F (3,36) = 13.91  |                  | D-gal-GT50 vs    | <i>P</i> > 0.05  |

Supplementary Table. 2. Statistical data of immunoblot analysis in control, D-galactose, gintonin (50 mg/kg or 100 mg/kg)-fed D-gal, and gintonin (100 mg/kg) groups. The table includes relative optic density (ROD), standard error of mean (SEM), p value, and degree of freedom. p-values shown in the table are obtained from post-hoc analysis using Bonferroni's multiple comparison test (n = 5 per group).

| Immunoblot marker |                   | Control          | D-gal       | D-gal-GT50     | D-gal-GT100     | GT100       |
|-------------------|-------------------|------------------|-------------|----------------|-----------------|-------------|
| DCX               | ROD               | 100              | 58.43.      | 72.03          | 88.27           | 99.9        |
|                   | SEM               | 4.064            | 3.763       | 3.613          | 3.392           | 5.65        |
|                   | <i>p</i> value    | Control vs.      | $P < 0.001$ | $P < 0.001$    | $P > 0.05$      | $P > 0.05$  |
|                   |                   |                  | D-gal vs.   | $P > 0.05$     | $P < 0.001$     | $P < 0.001$ |
|                   |                   |                  |             | D-gal-GT50 vs. | $P > 0.05$      | $P < 0.001$ |
|                   | Degree of freedom | F (4,45) = 18.98 |             |                | D-gal-GT100 vs. | $P > 0.05$  |
| LPA1 receptor     | ROD               | 100              | 67.66       | 76.89          | 87.13           | 97.58       |
|                   | SEM               | 5.162            | 3.903       | 4.116          | 3.307           | 3.974       |
|                   | <i>p</i> value    | Control vs.      | $P < 0.001$ | $P < 0.01$     | $P > 0.05$      | $P > 0.05$  |
|                   |                   |                  | D-gal vs.   | $P > 0.05$     | $P < 0.05$      | $P < 0.001$ |
|                   |                   |                  |             | D-gal-GT50 vs. | $P > 0.05$      | $P < 0.01$  |
|                   | Degree of freedom | F (4,45) = 10.96 |             |                | D-gal-GT100 vs. | $P > 0.05$  |
