# Supplementary material
Source: publisher figshare collection journal article supplement (https://karger.figshare.com/articles/dataset/_/7000487)

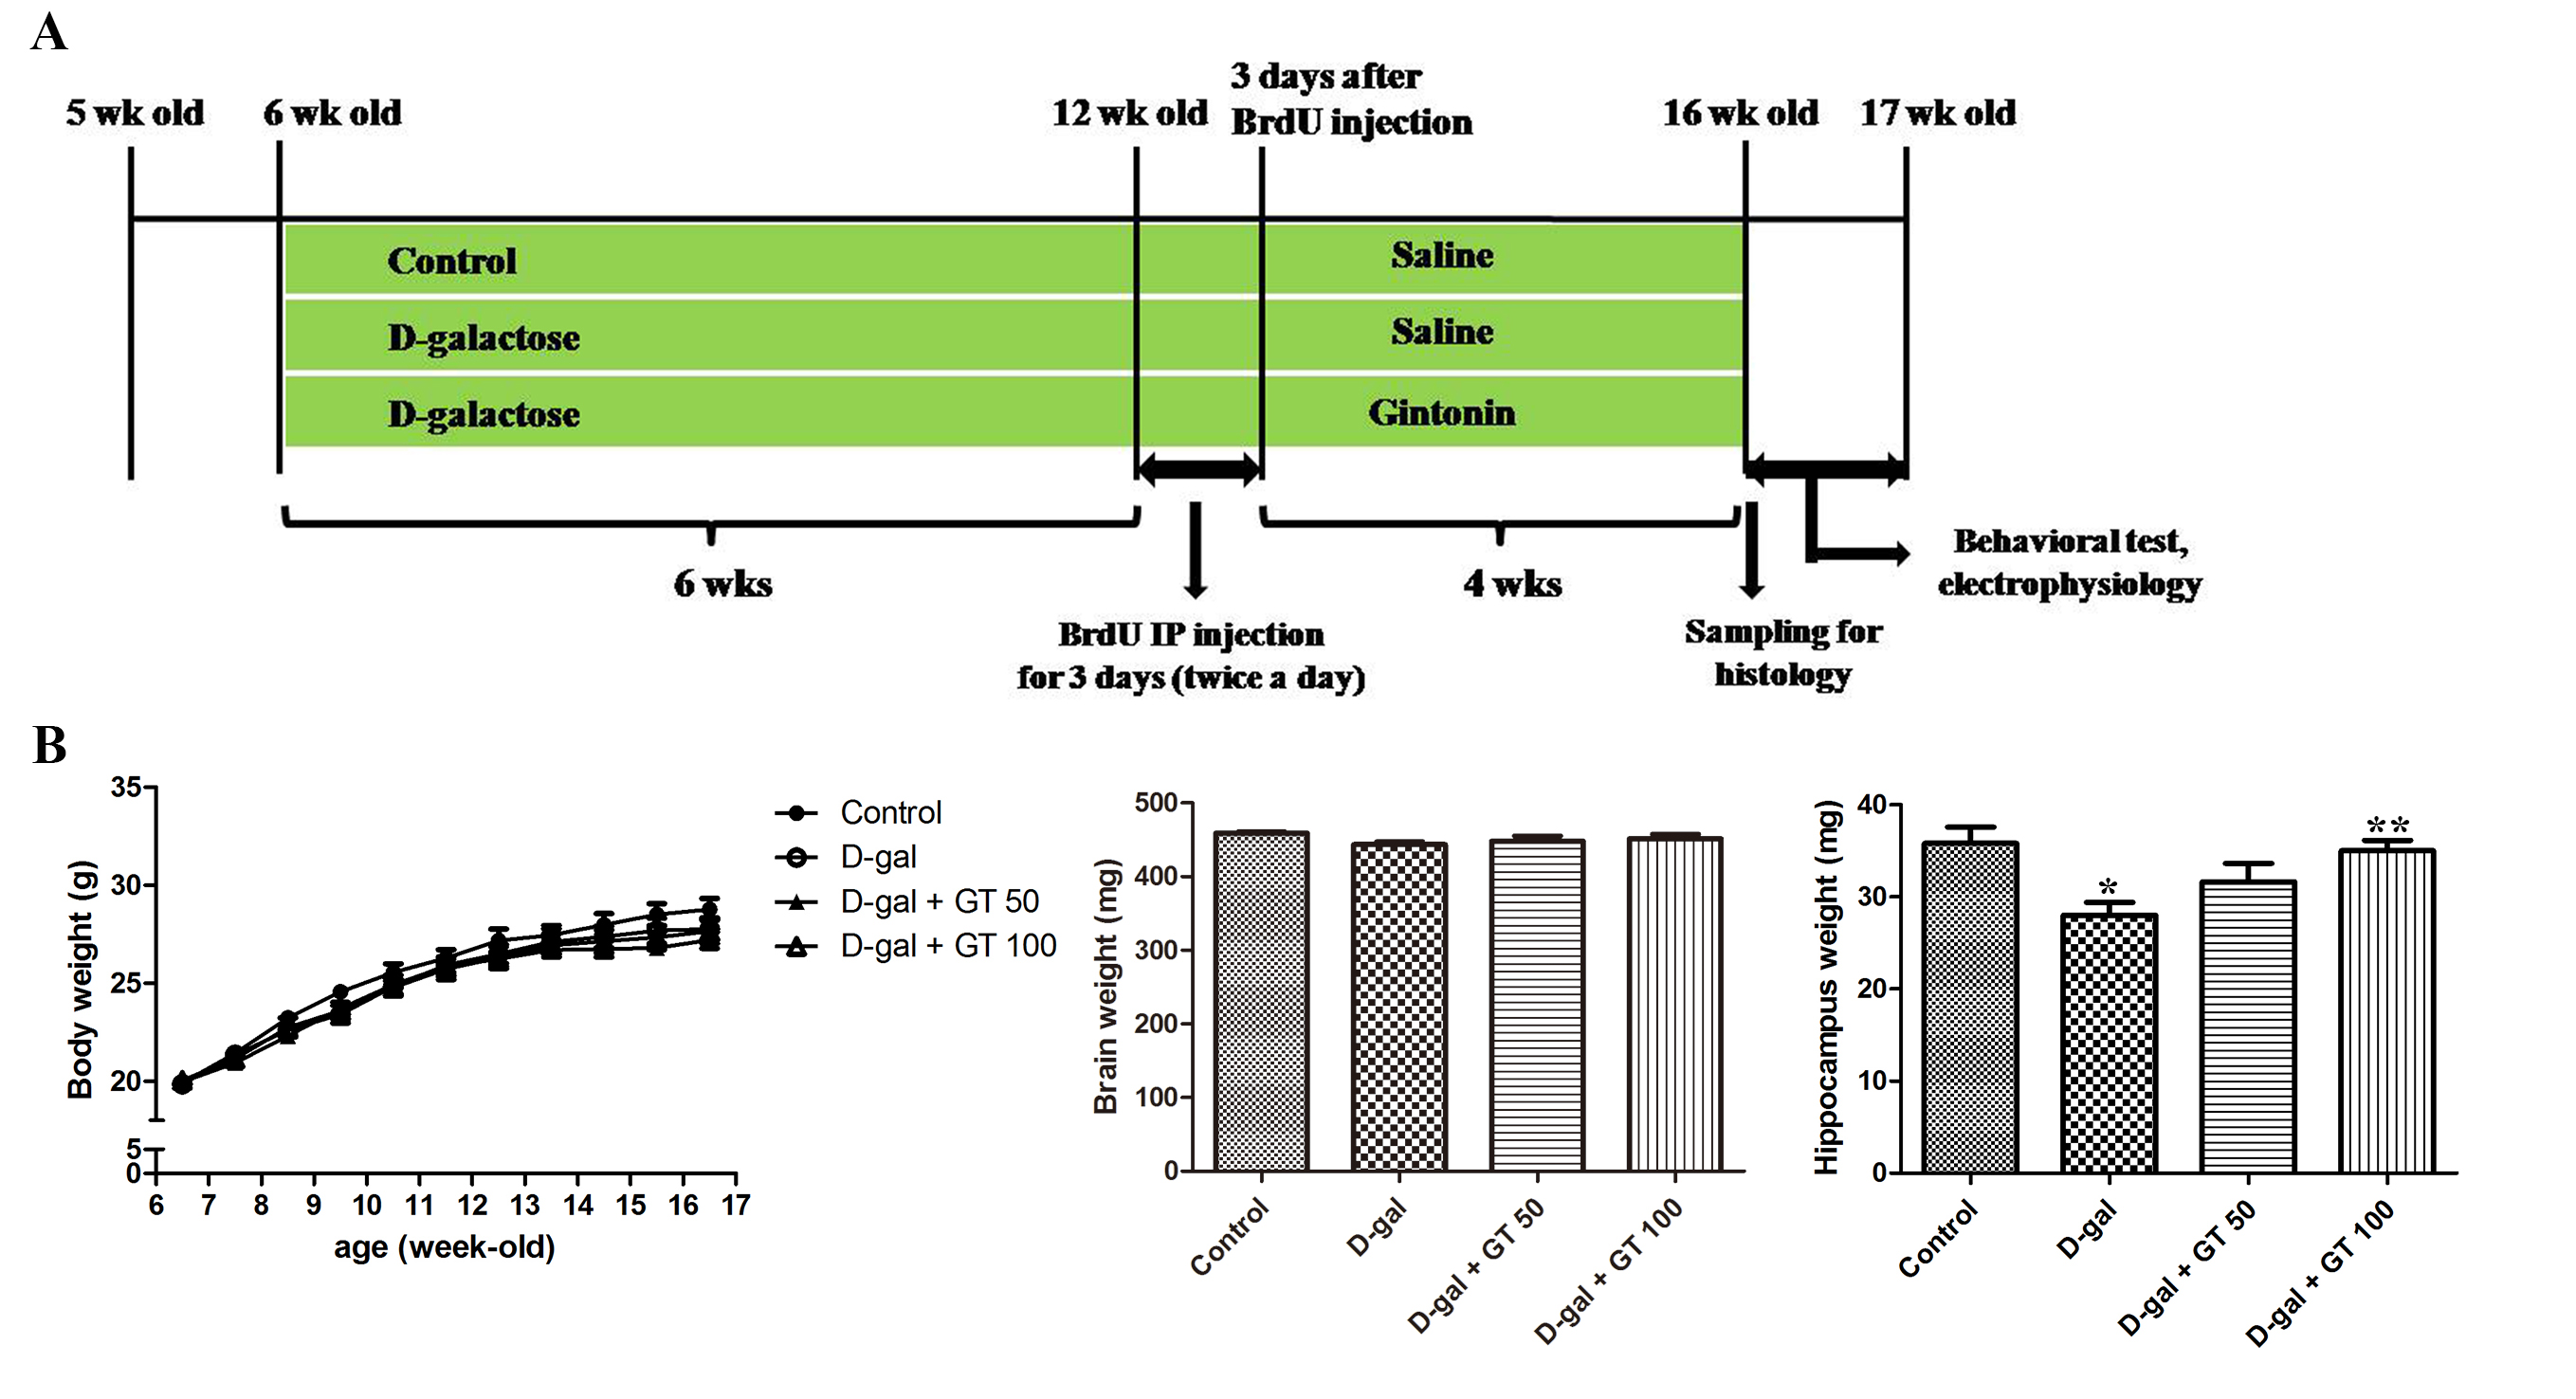

Supplement: Supplementary file 1 [file 1 › GER491113_sm1.jpg]

**A**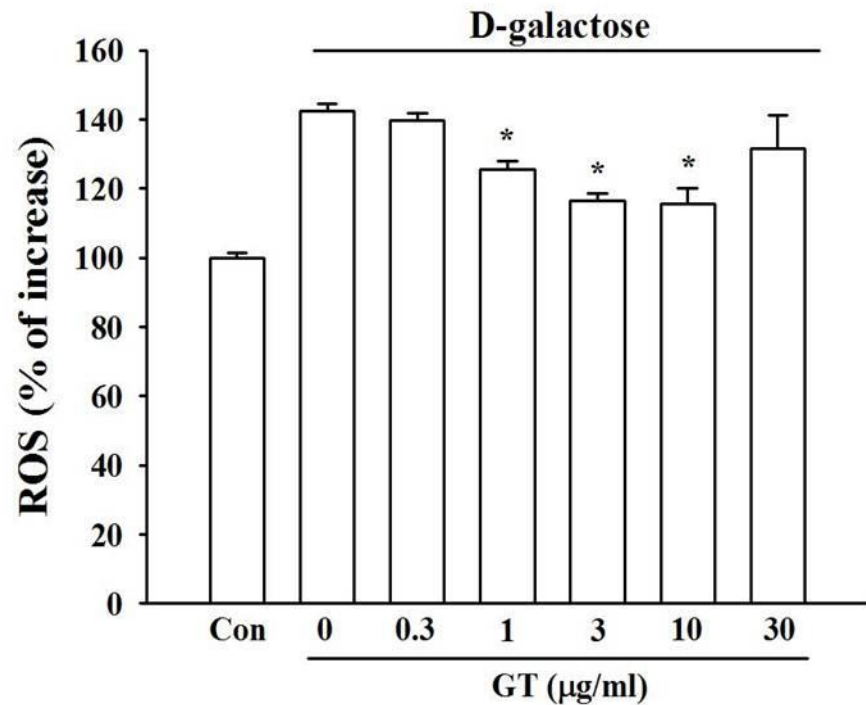**B**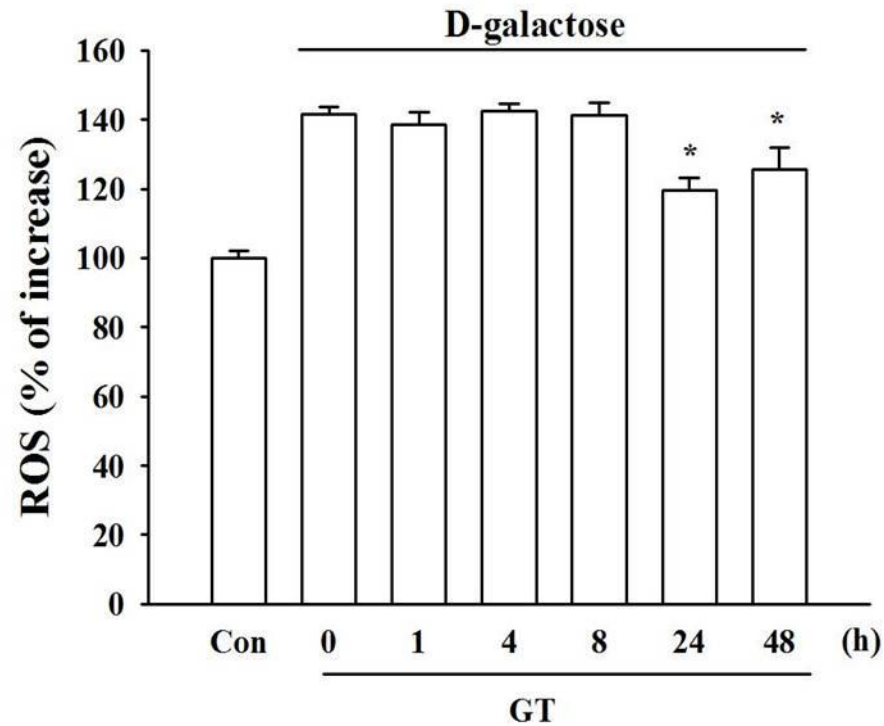

Supplement: Supplementary file 1 [file 1 › GER491113_sm8.PDF]

**A**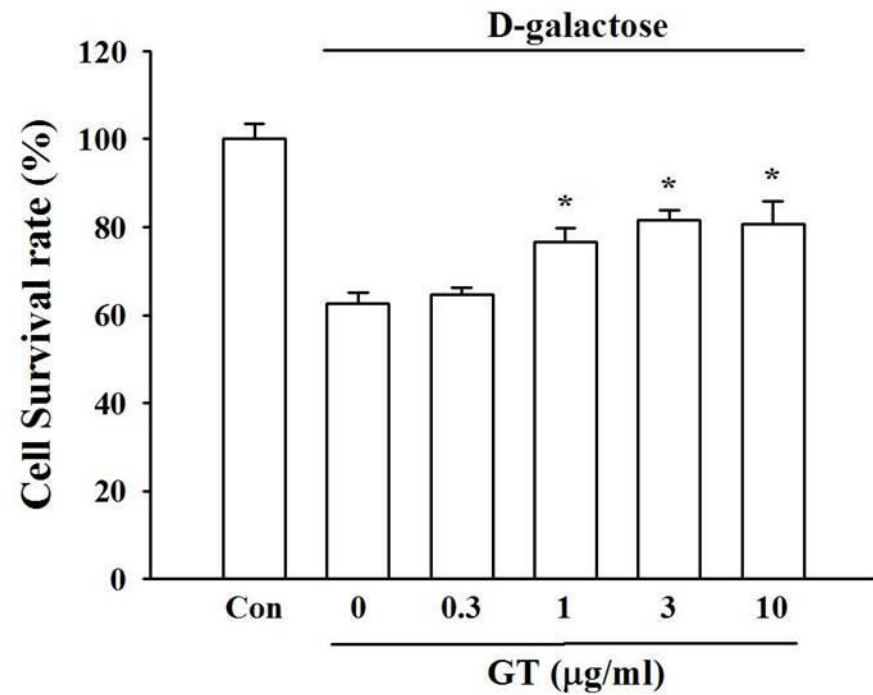**B**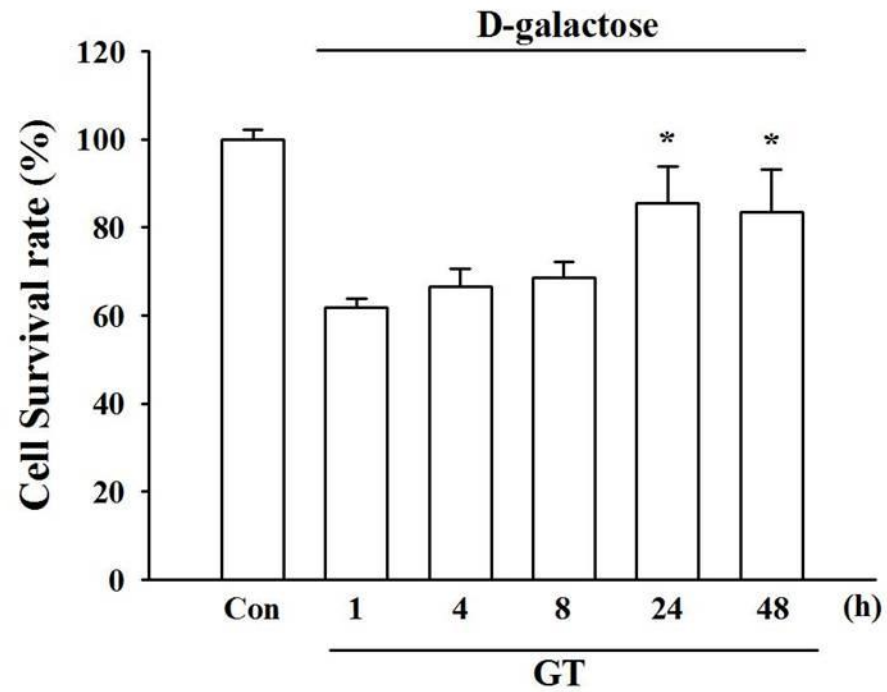

Supplement: Supplementary file 1 [file 1 › GER491113_sm7.PDF]

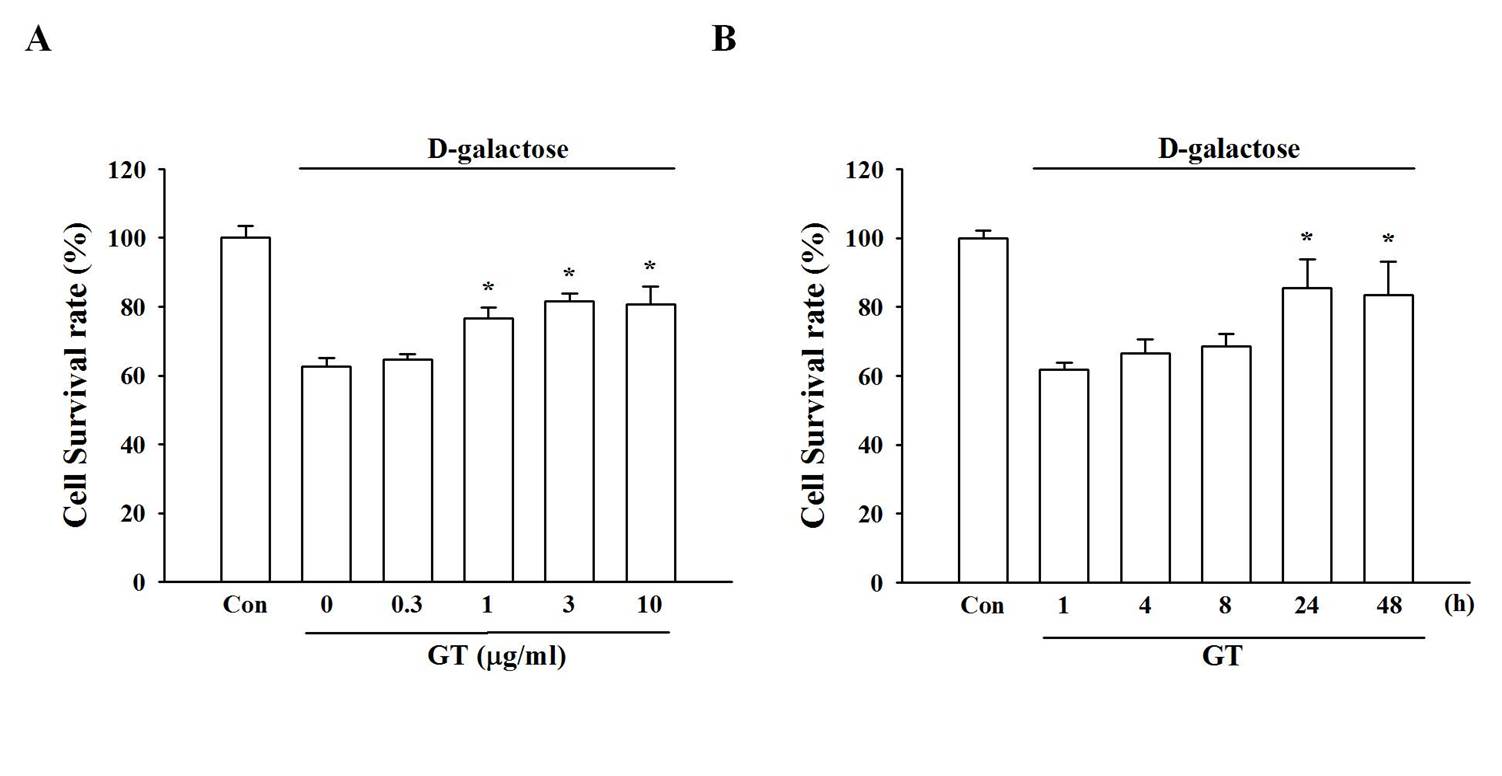

Supplement: Supplementary file 1 [file 1 › GER491113_sm7.jpg]

**A**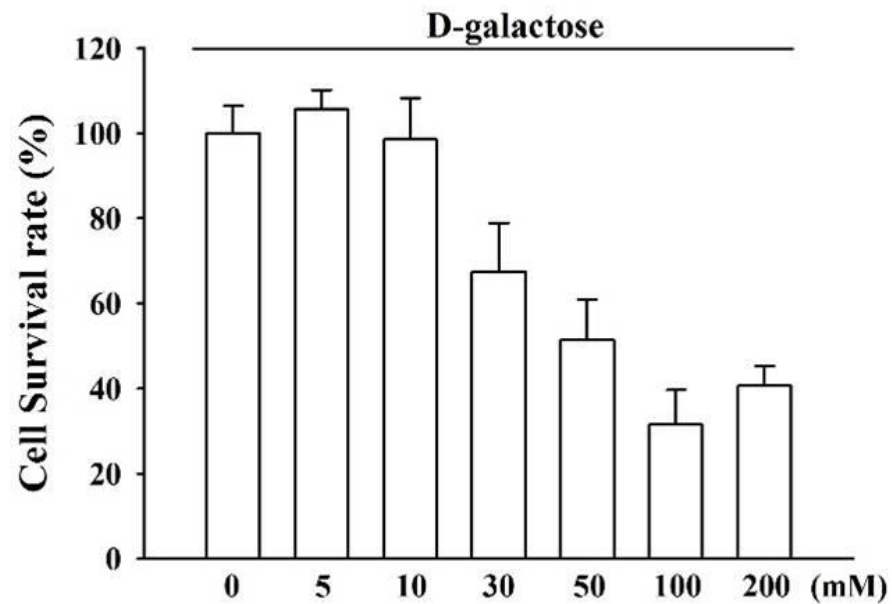**B**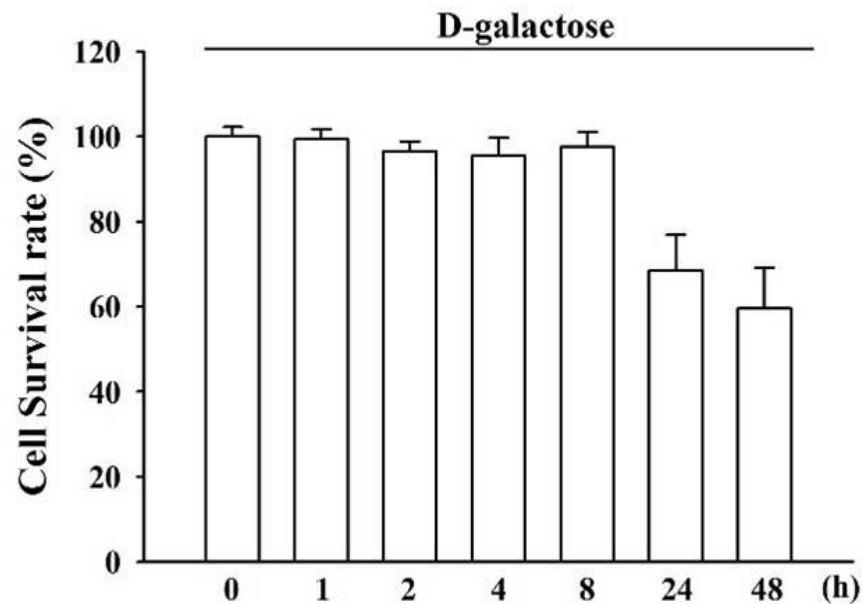

Supplement: Supplementary file 1 [file 1 › GER491113_sm6.PDF]

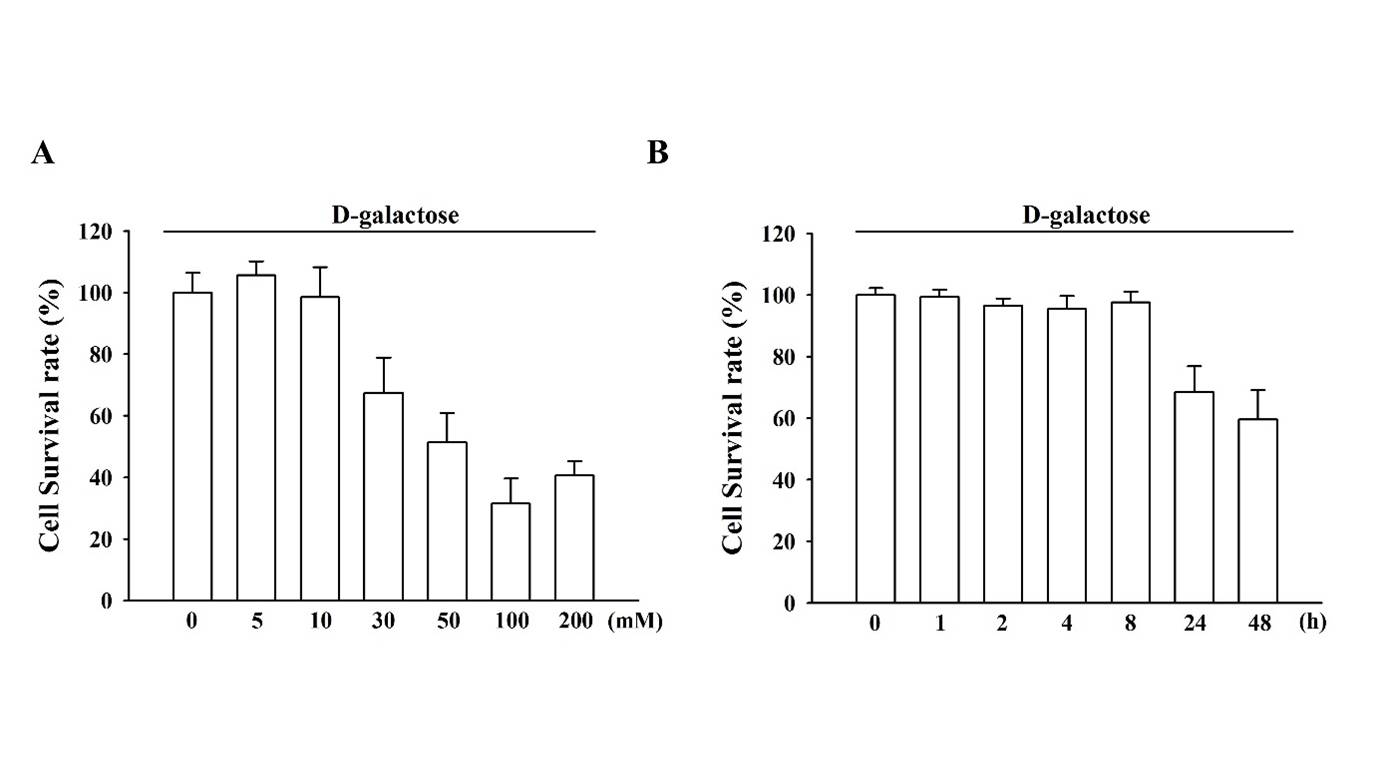

Supplement: Supplementary file 1 [file 1 › GER491113_sm6.jpg]

**A**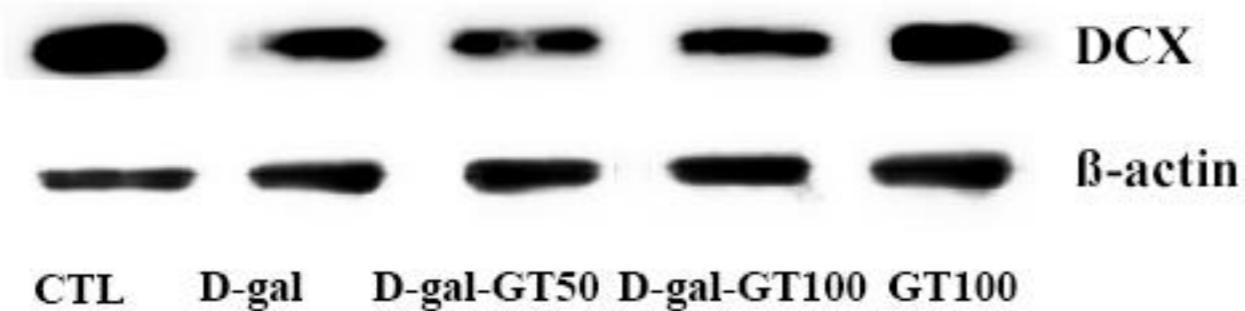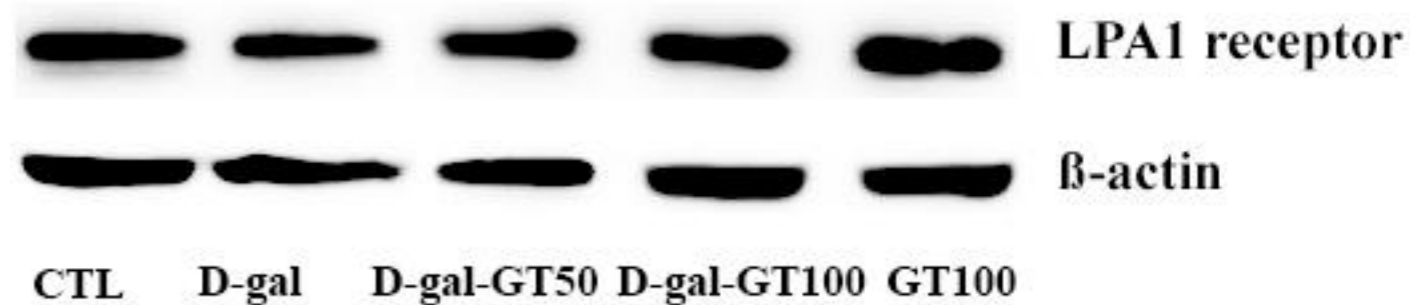**B**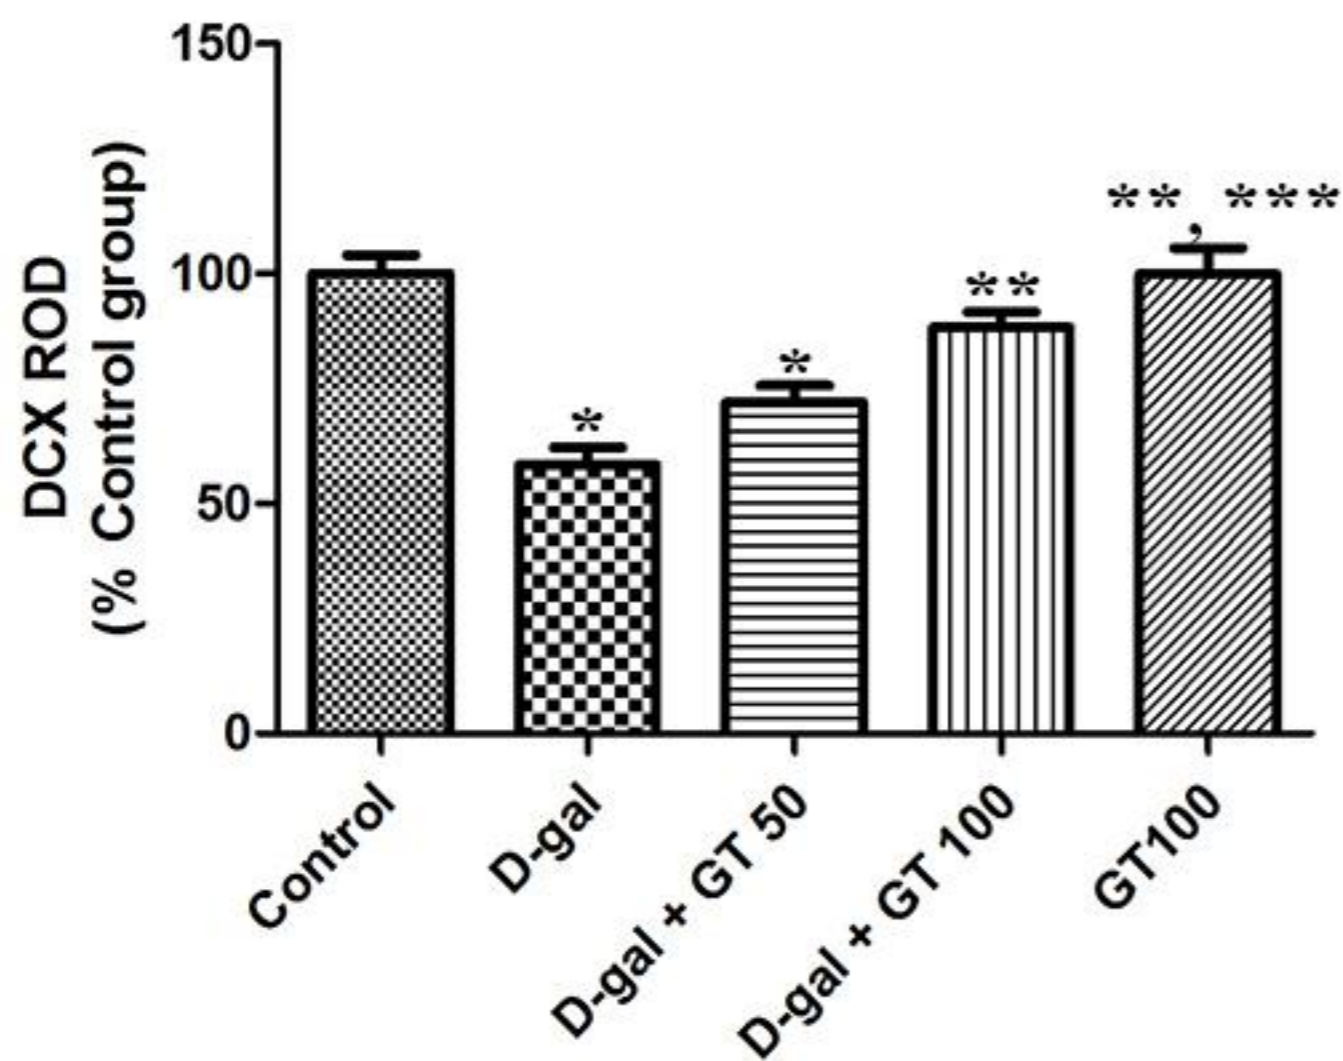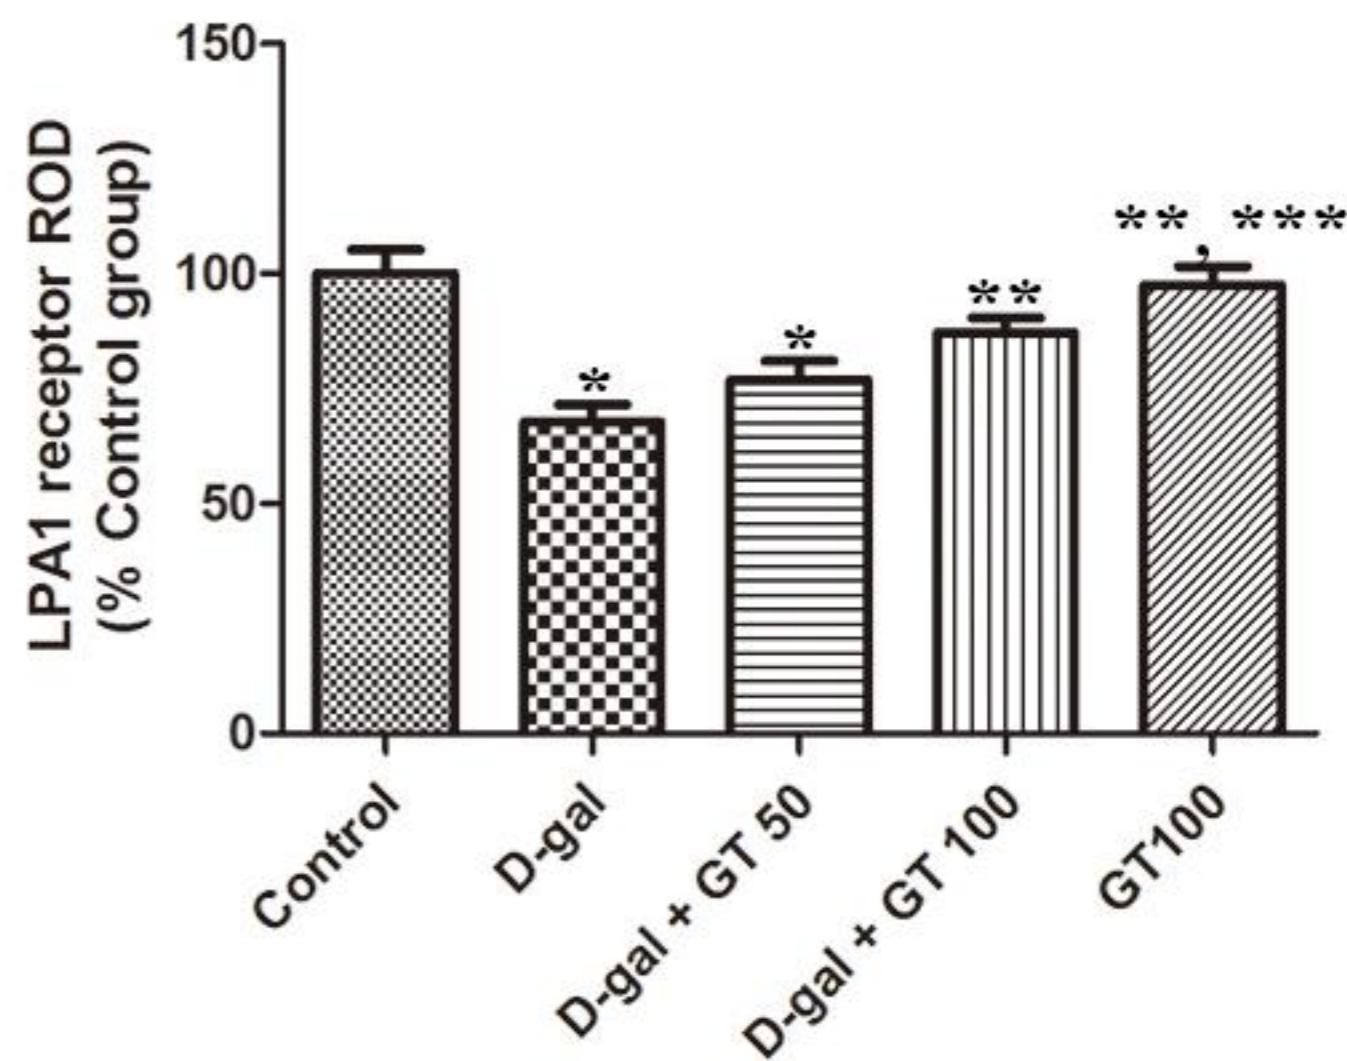

Supplement: Supplementary file 1 [file 1 › GER491113_sm5.PDF]

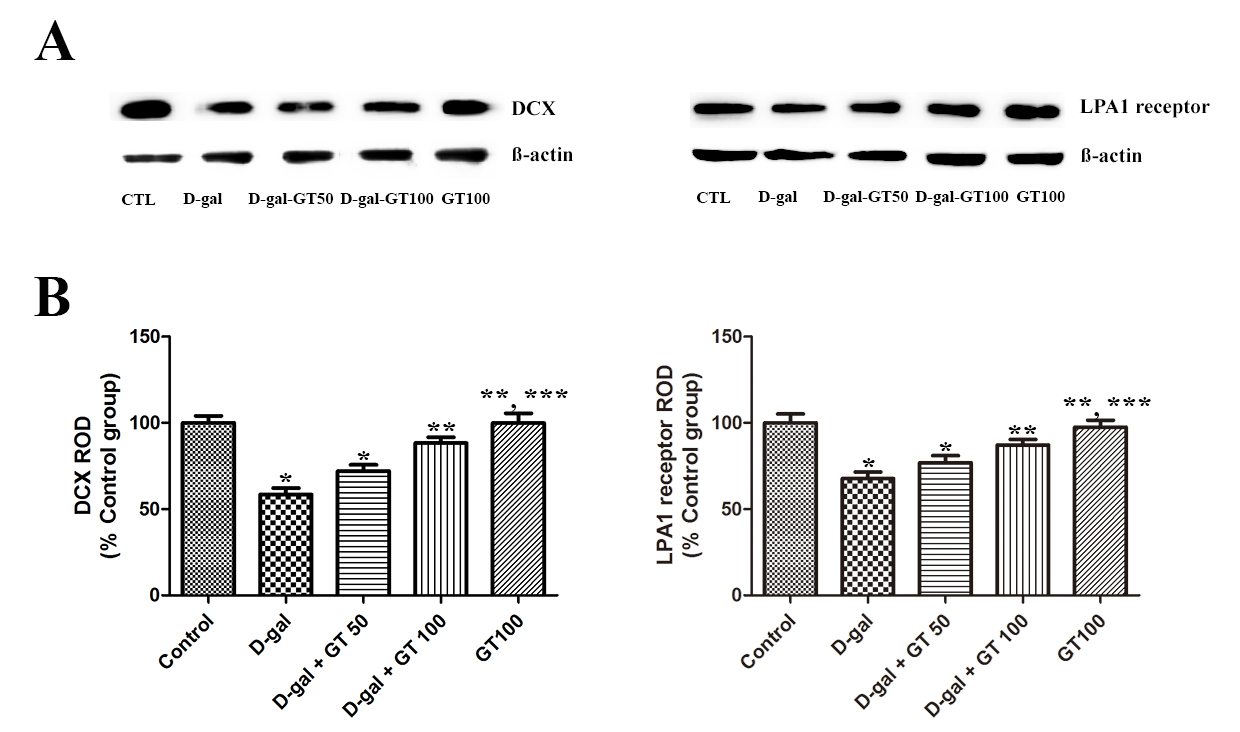

Supplement: Supplementary file 1 [file 1 › GER491113_sm5.jpg]

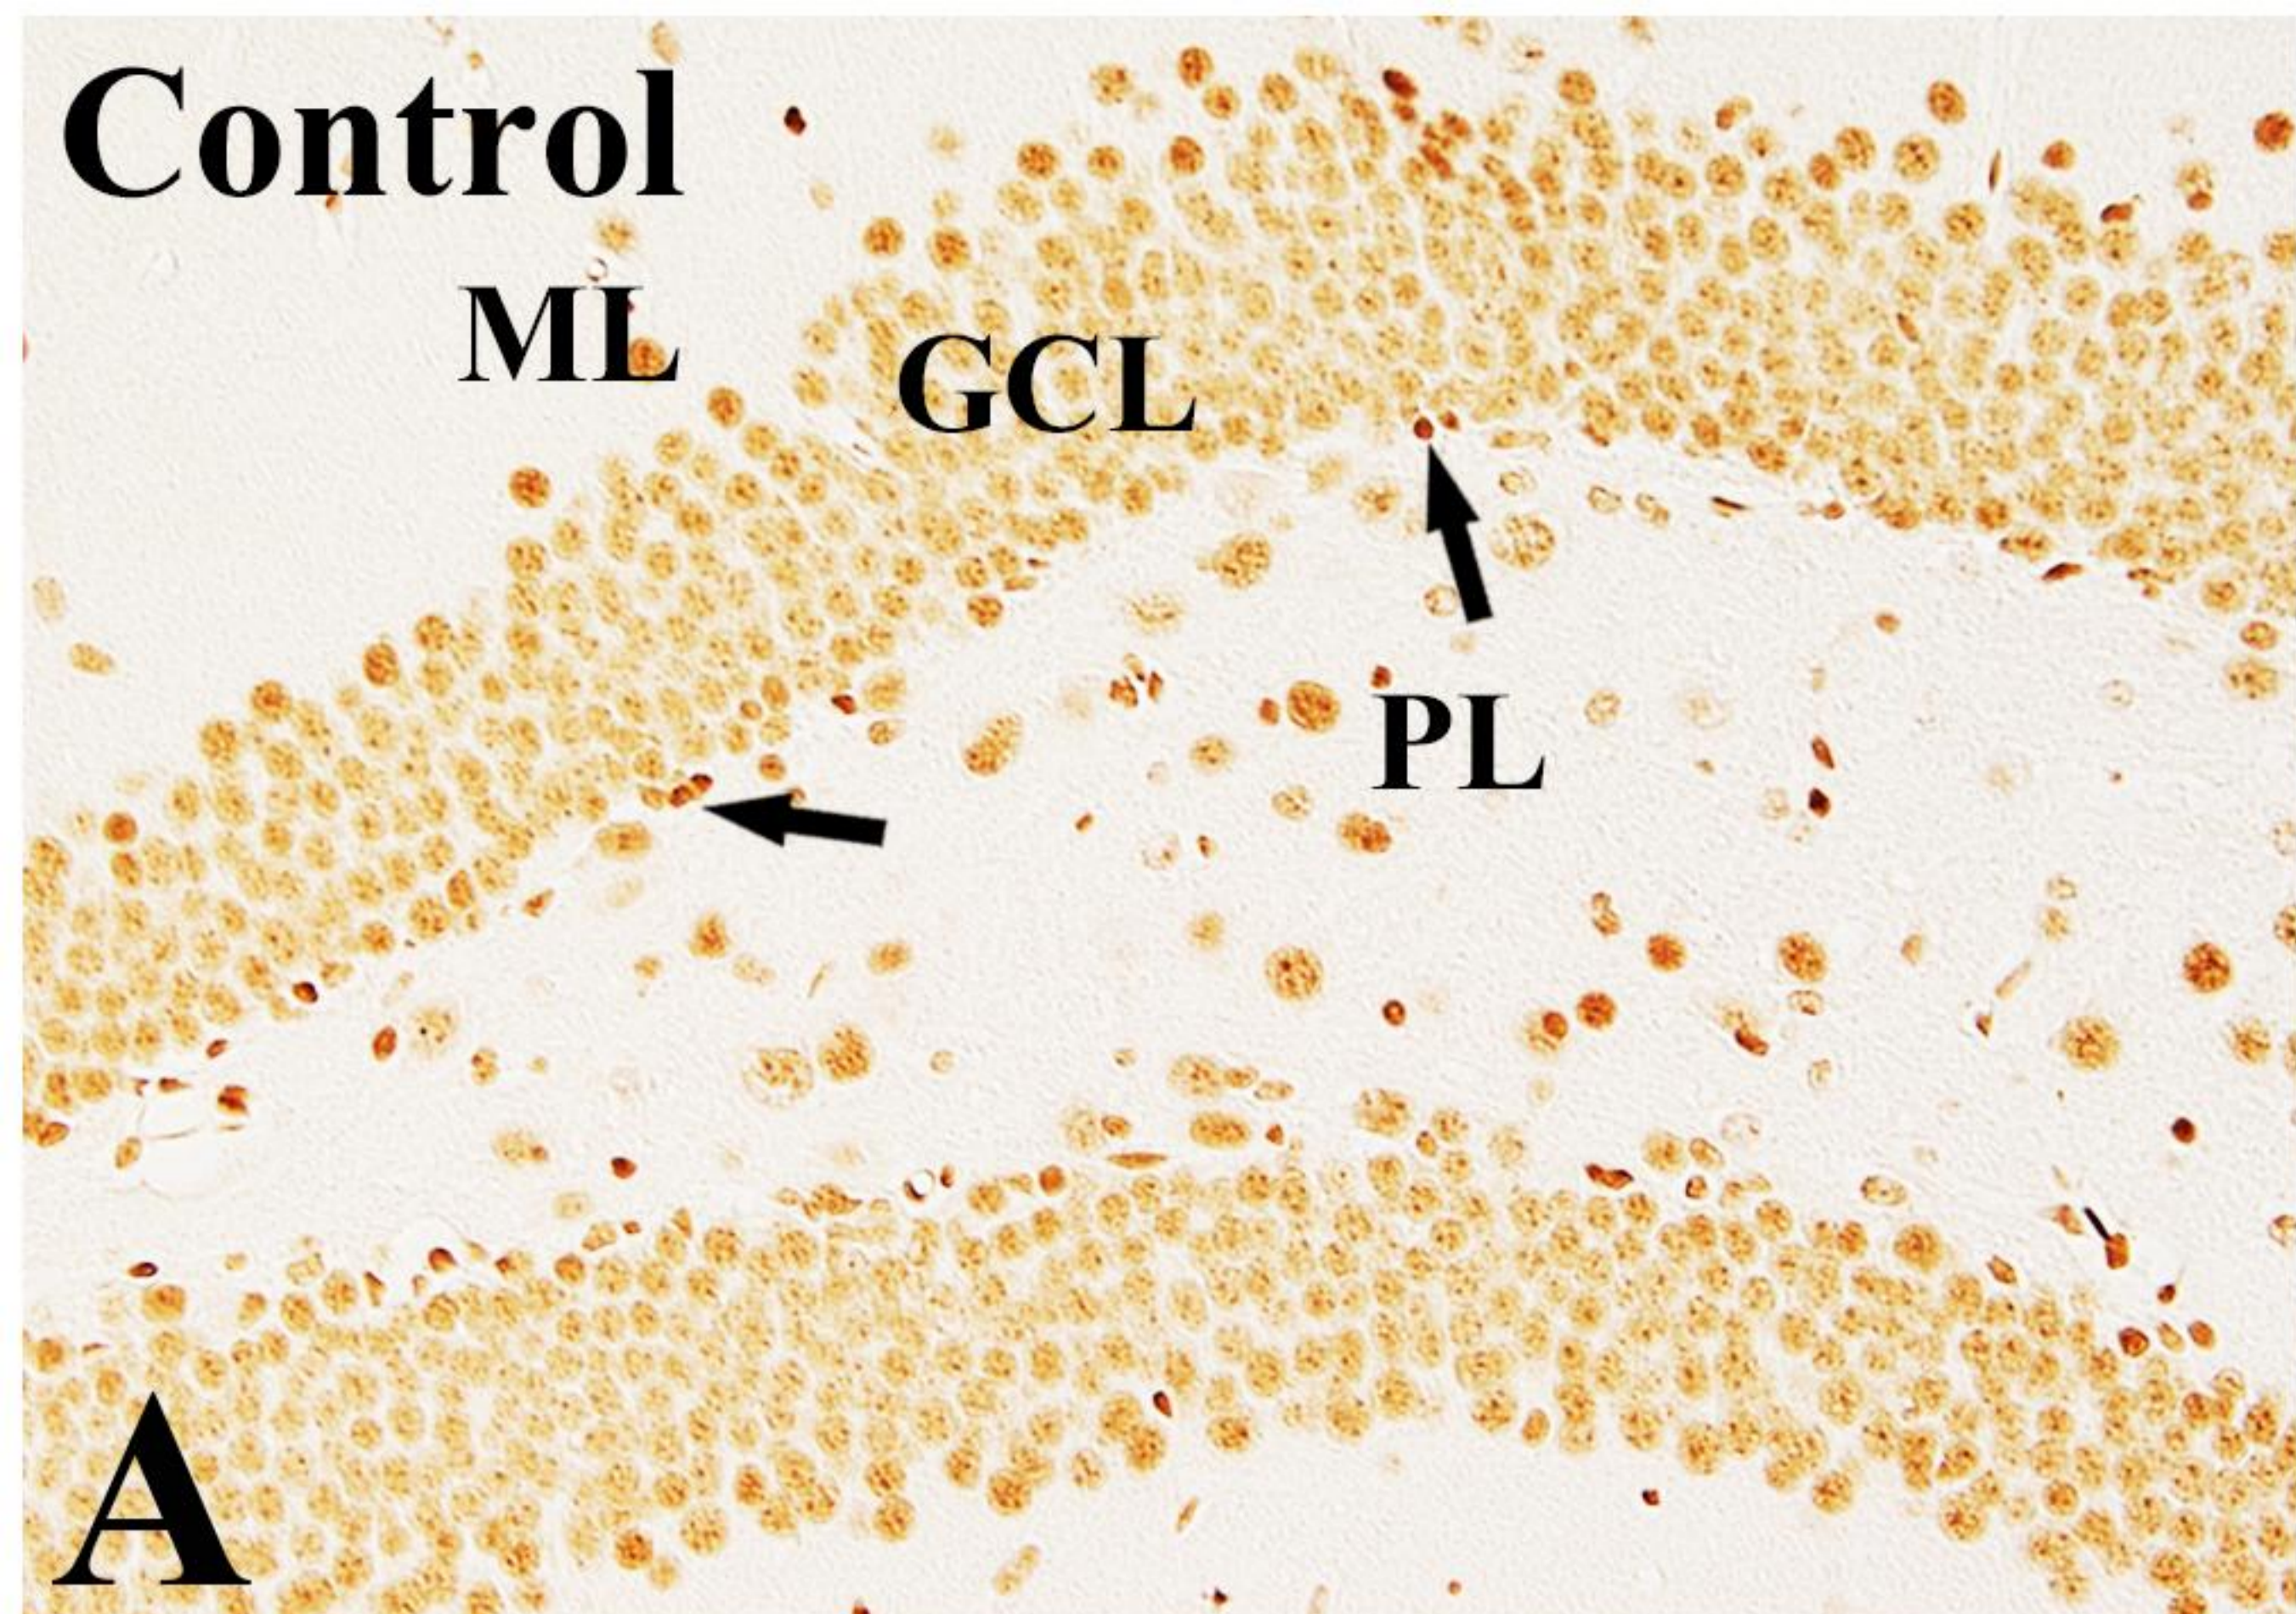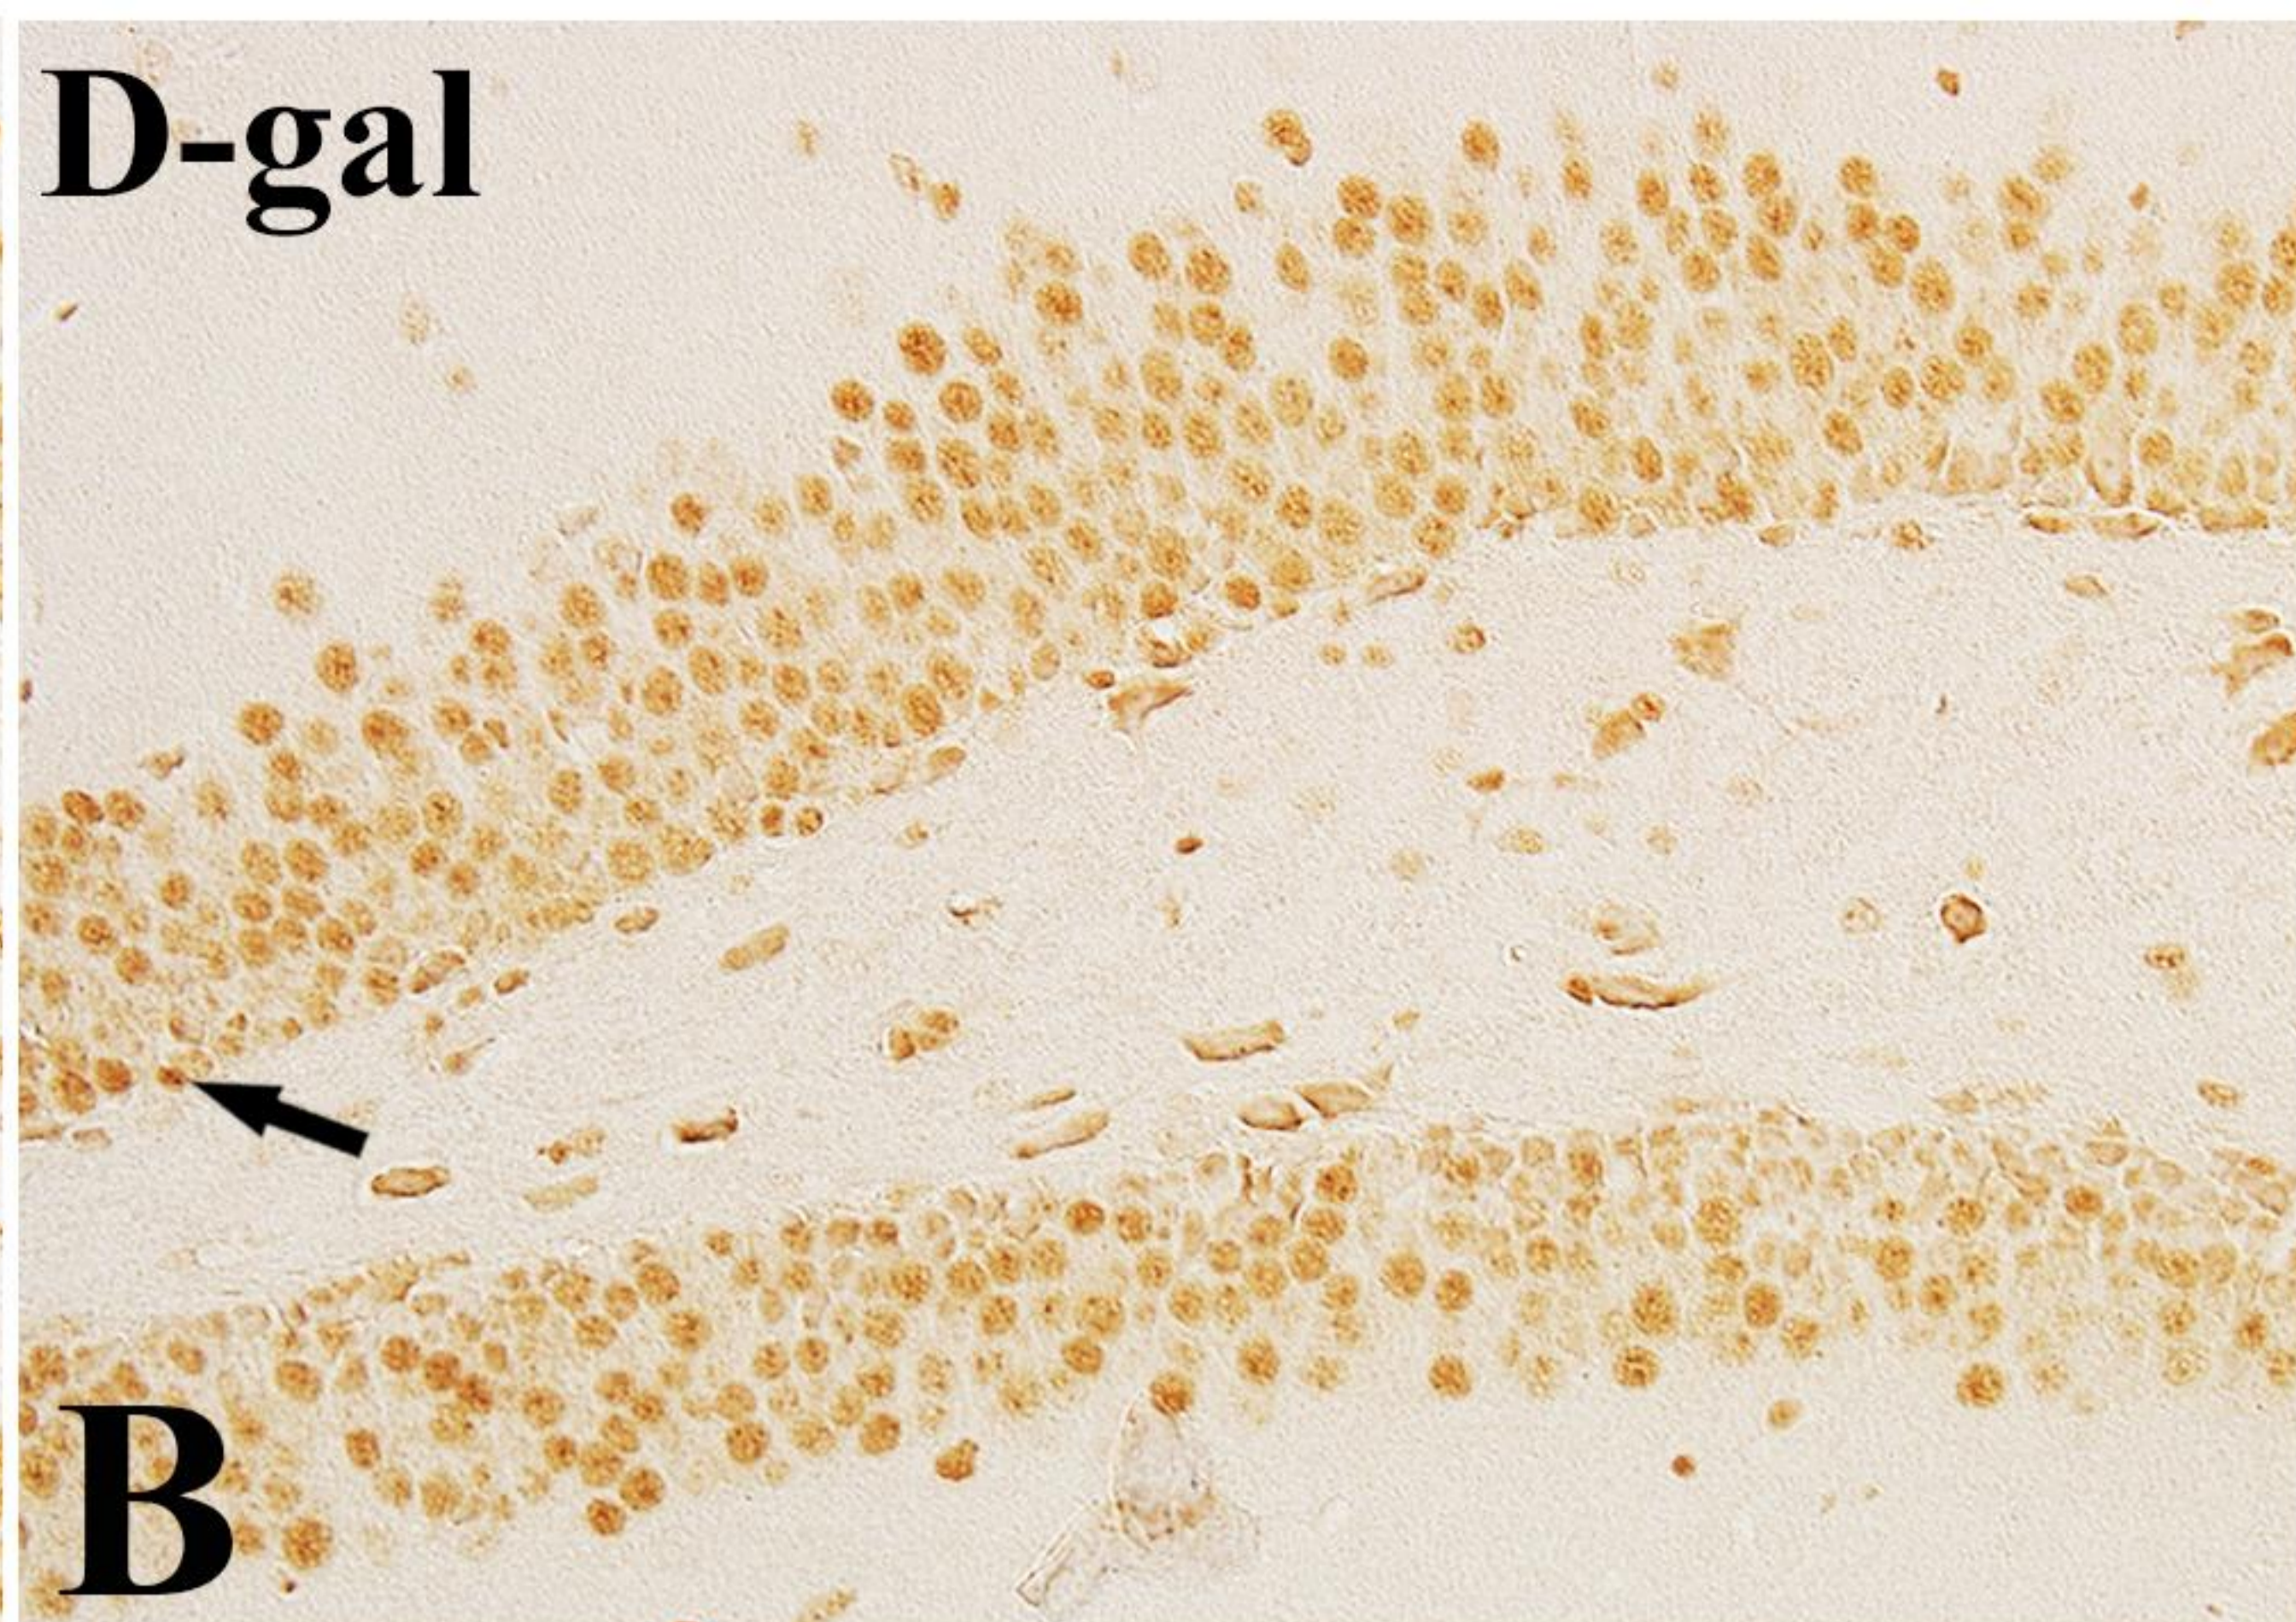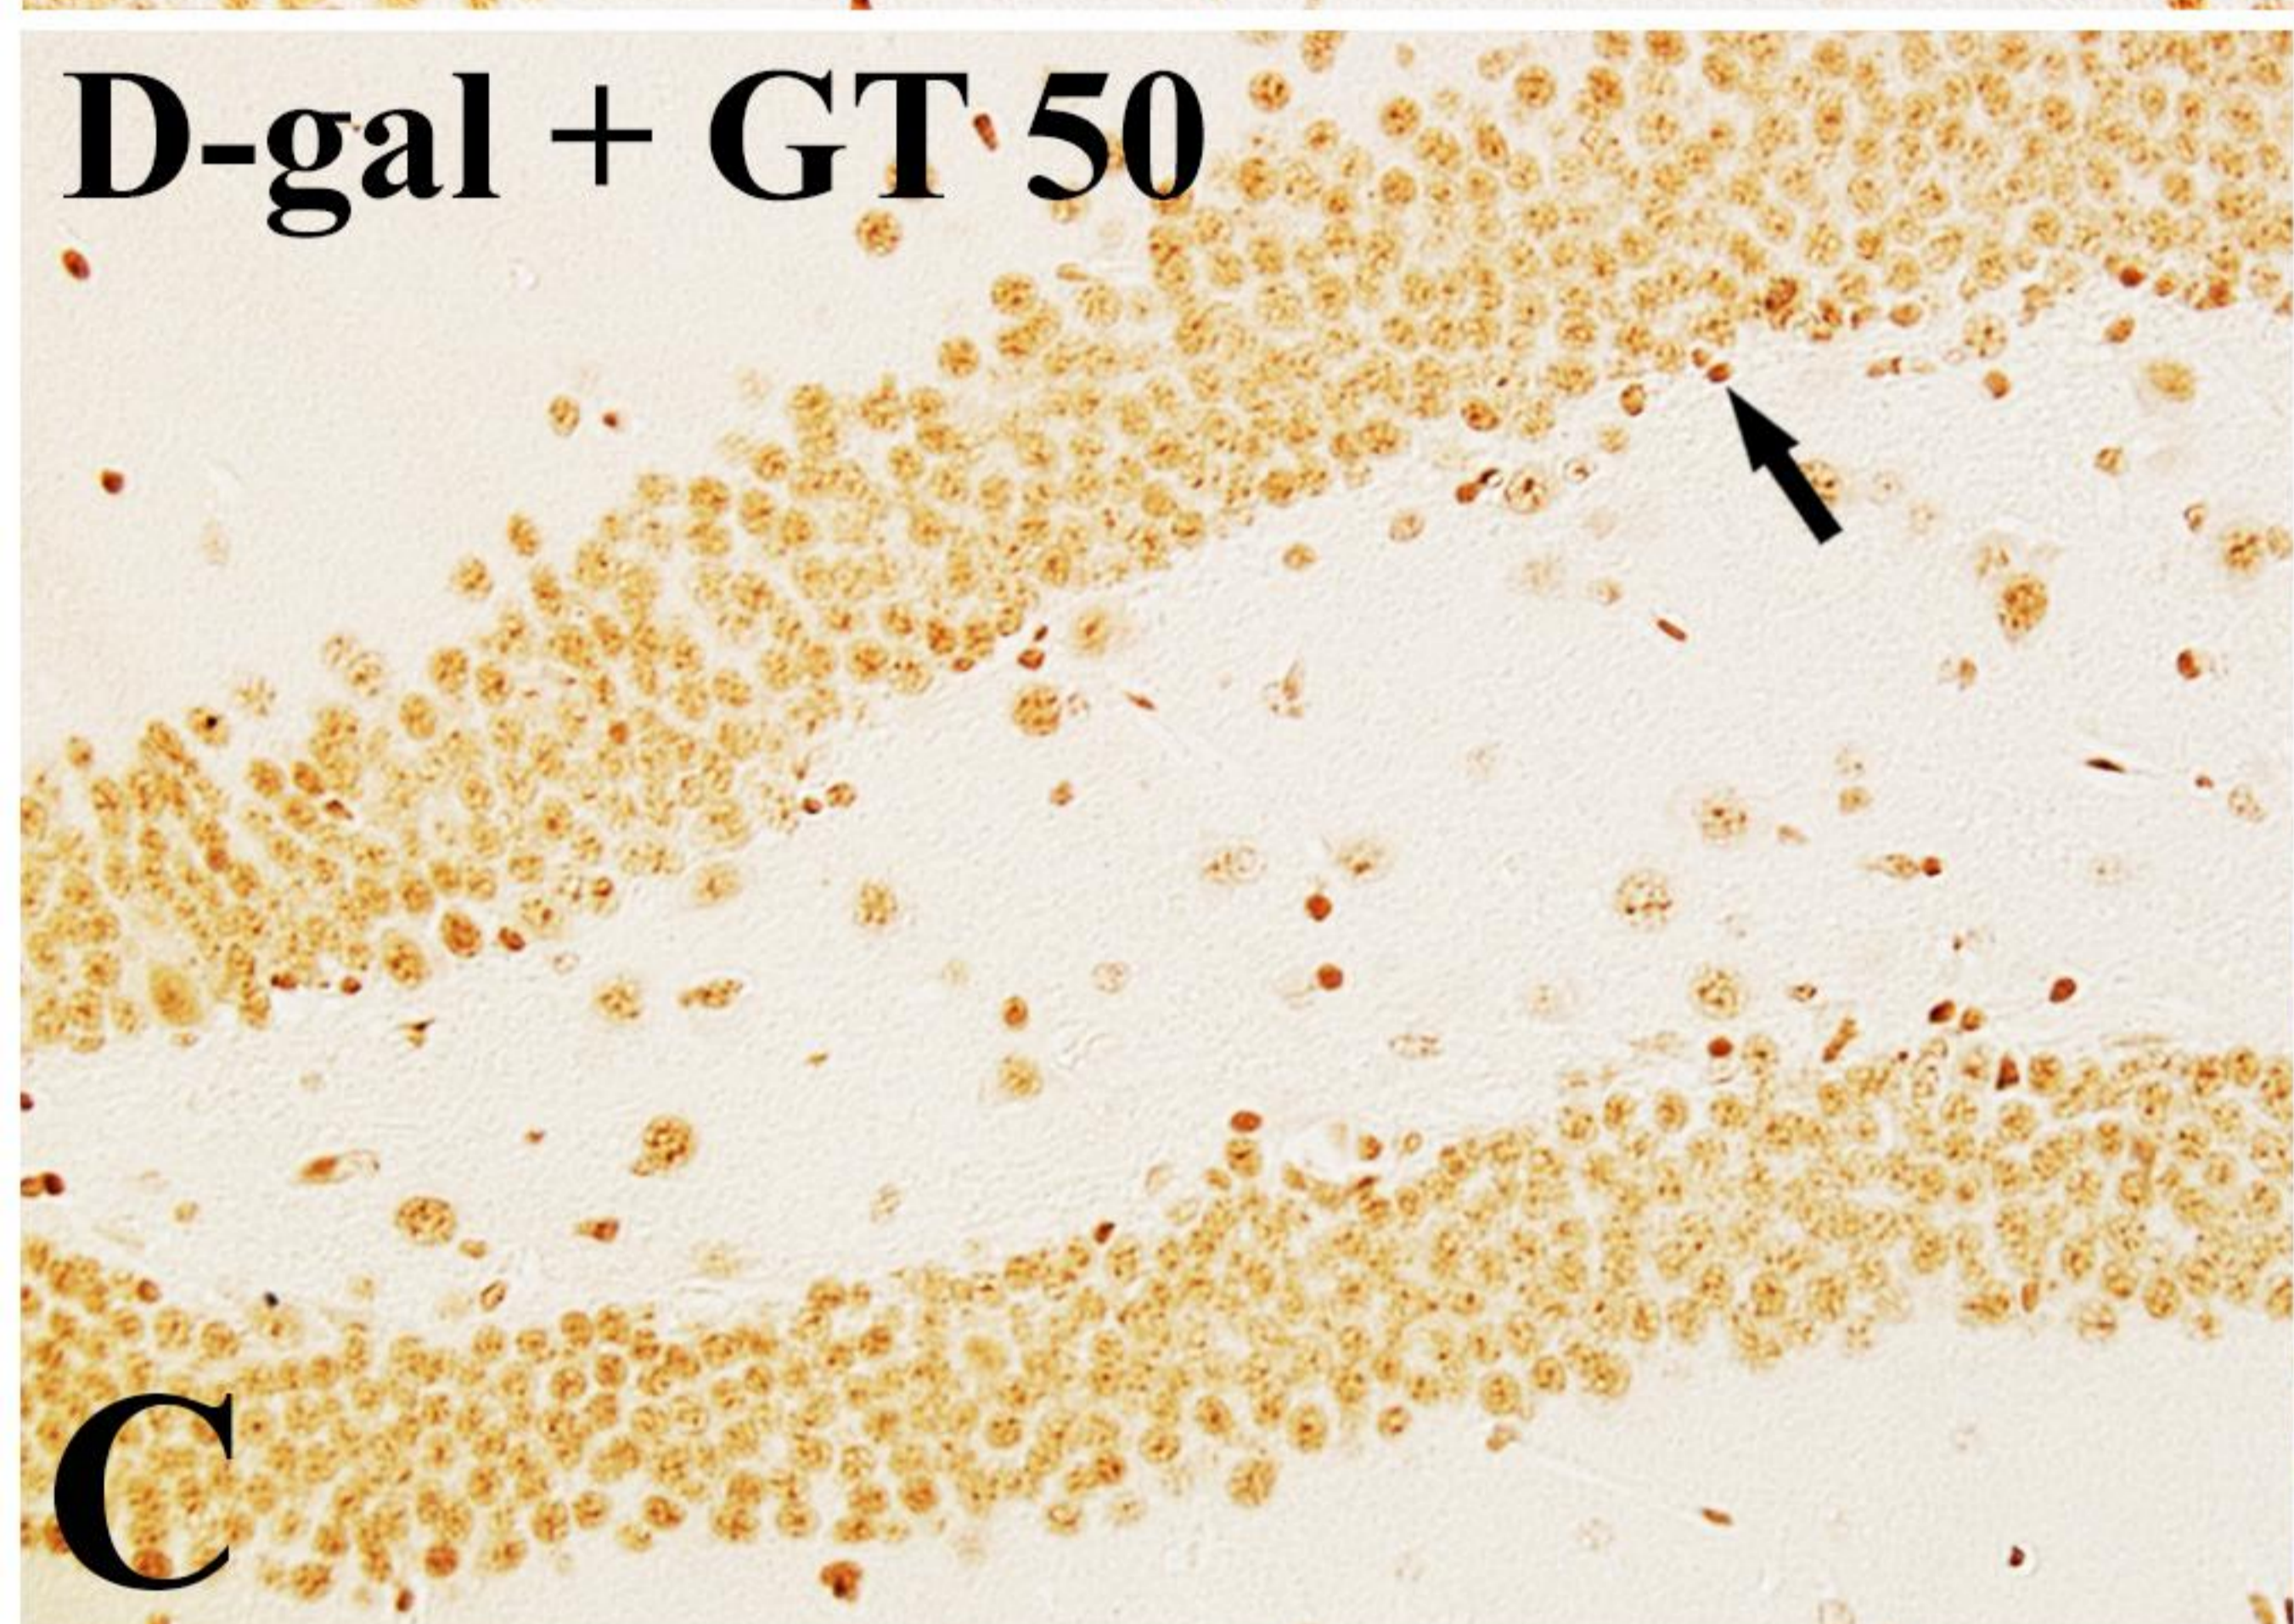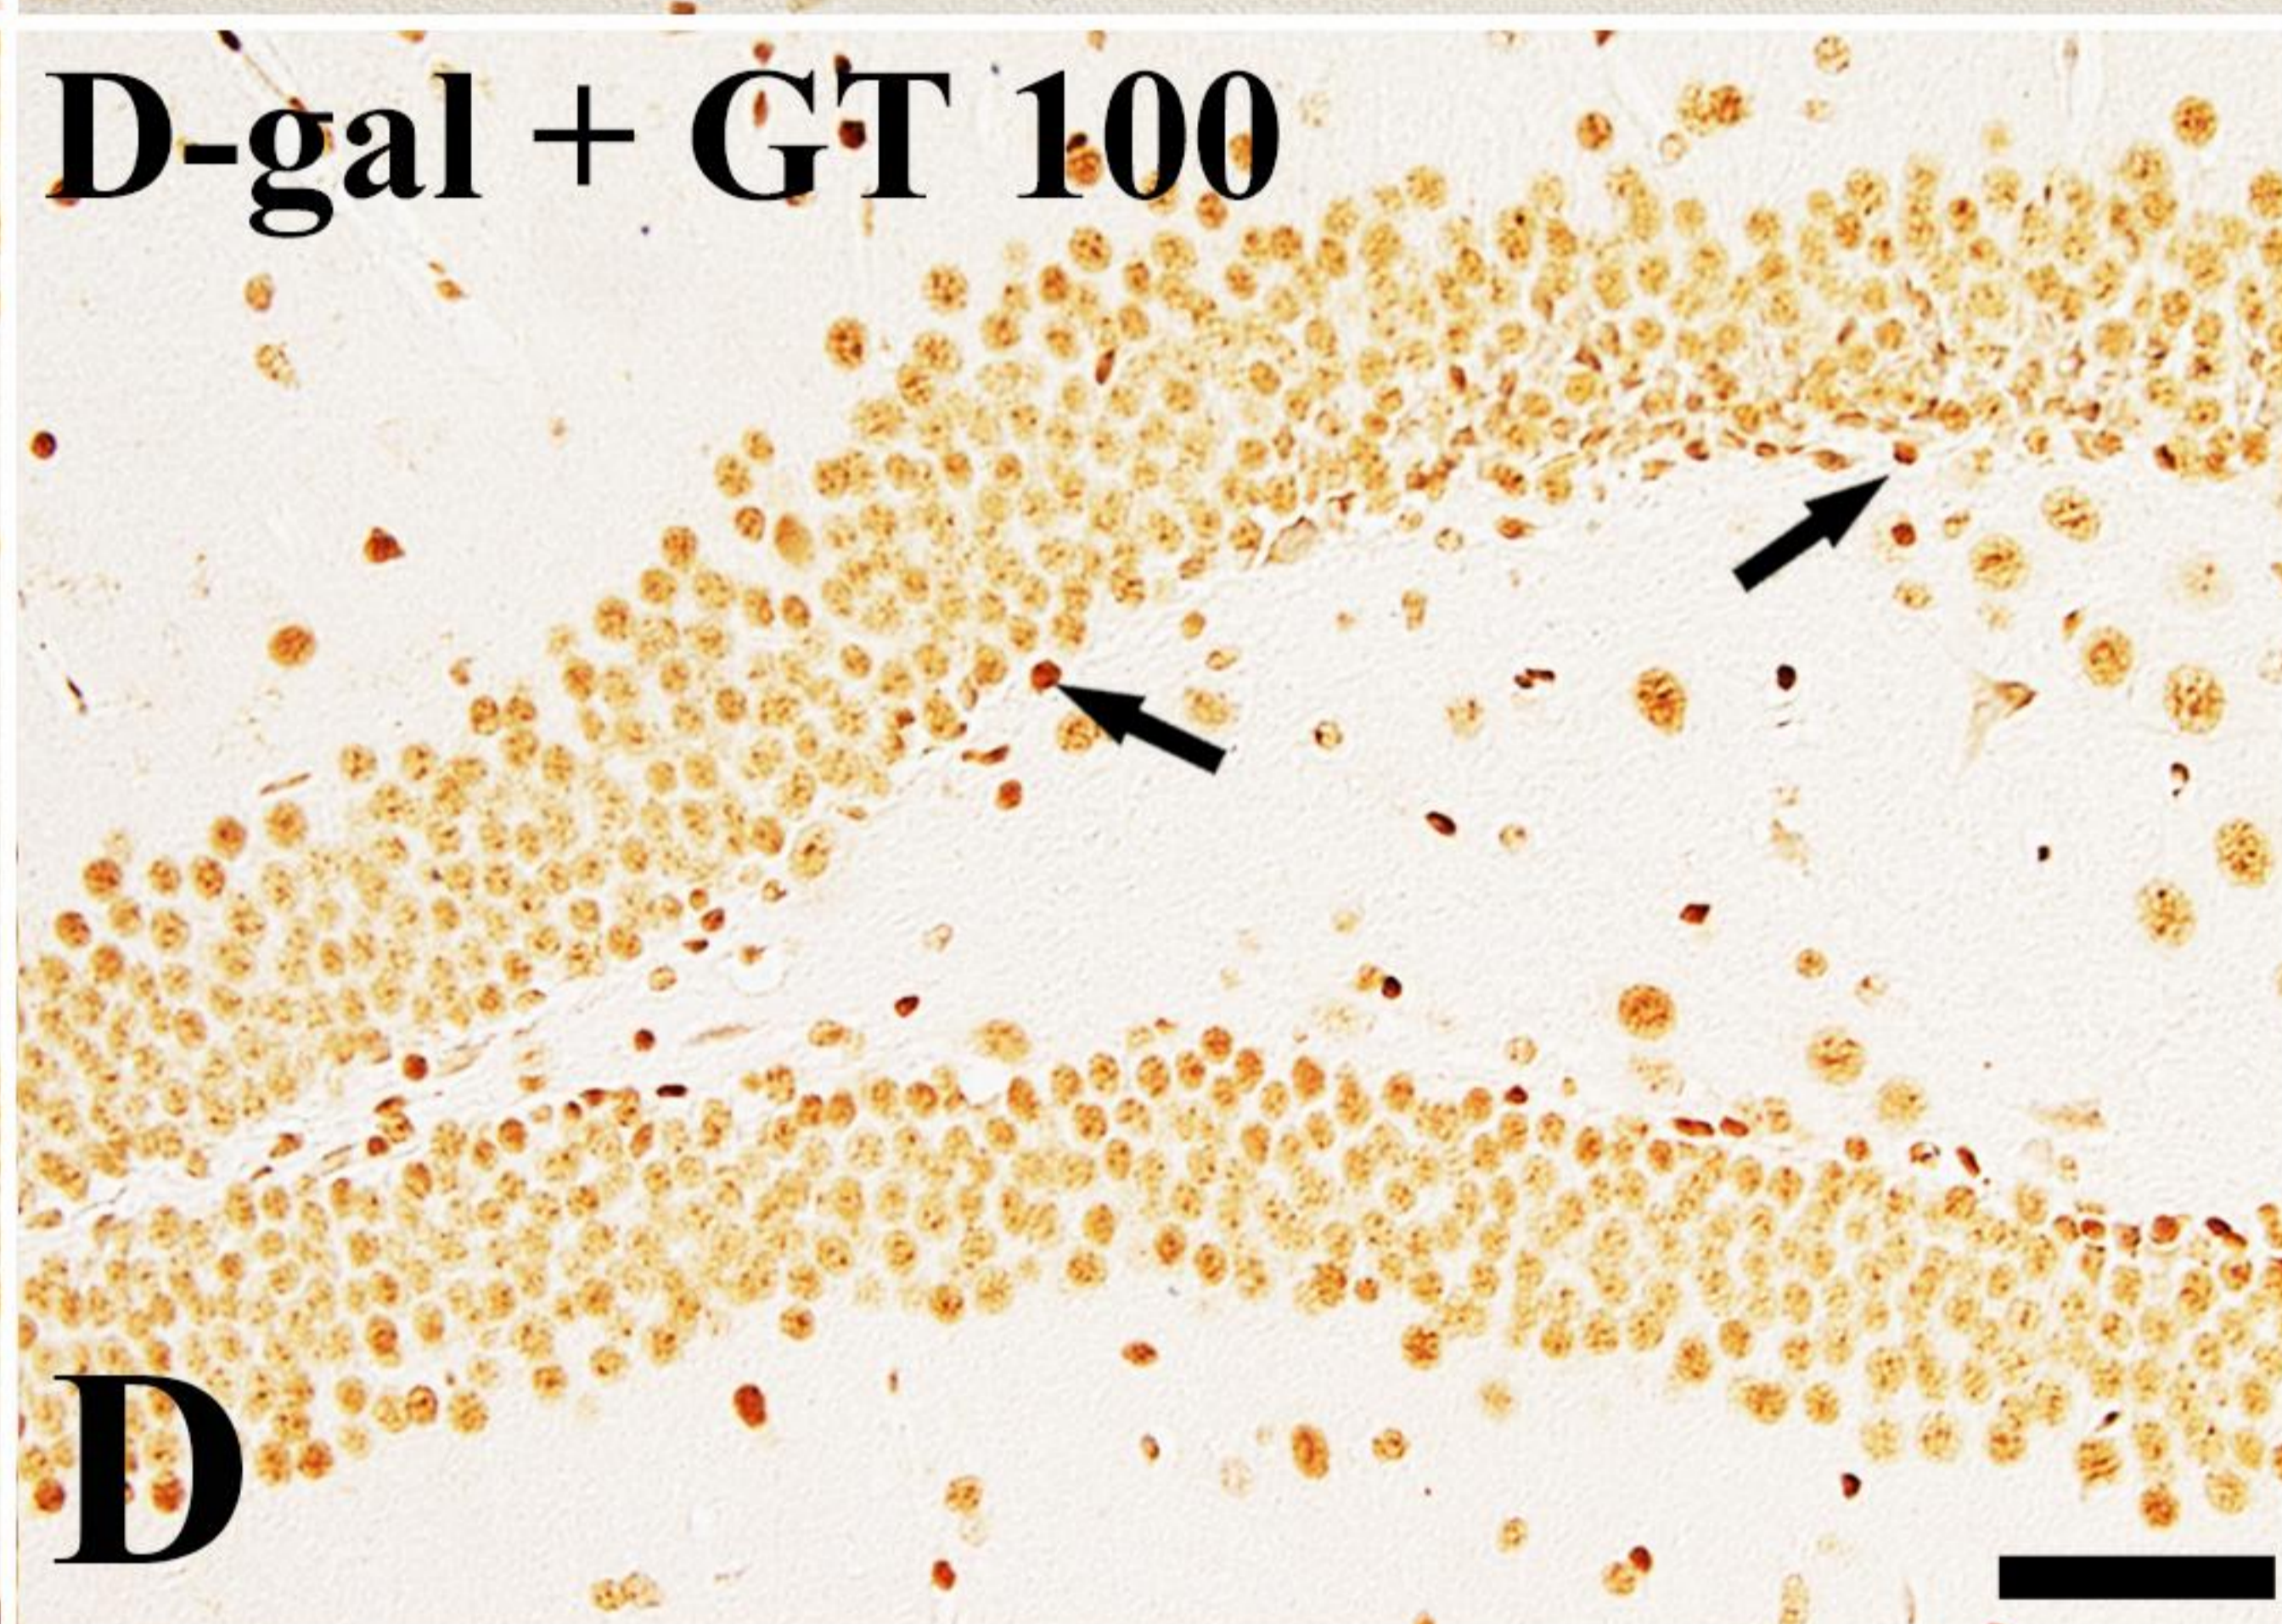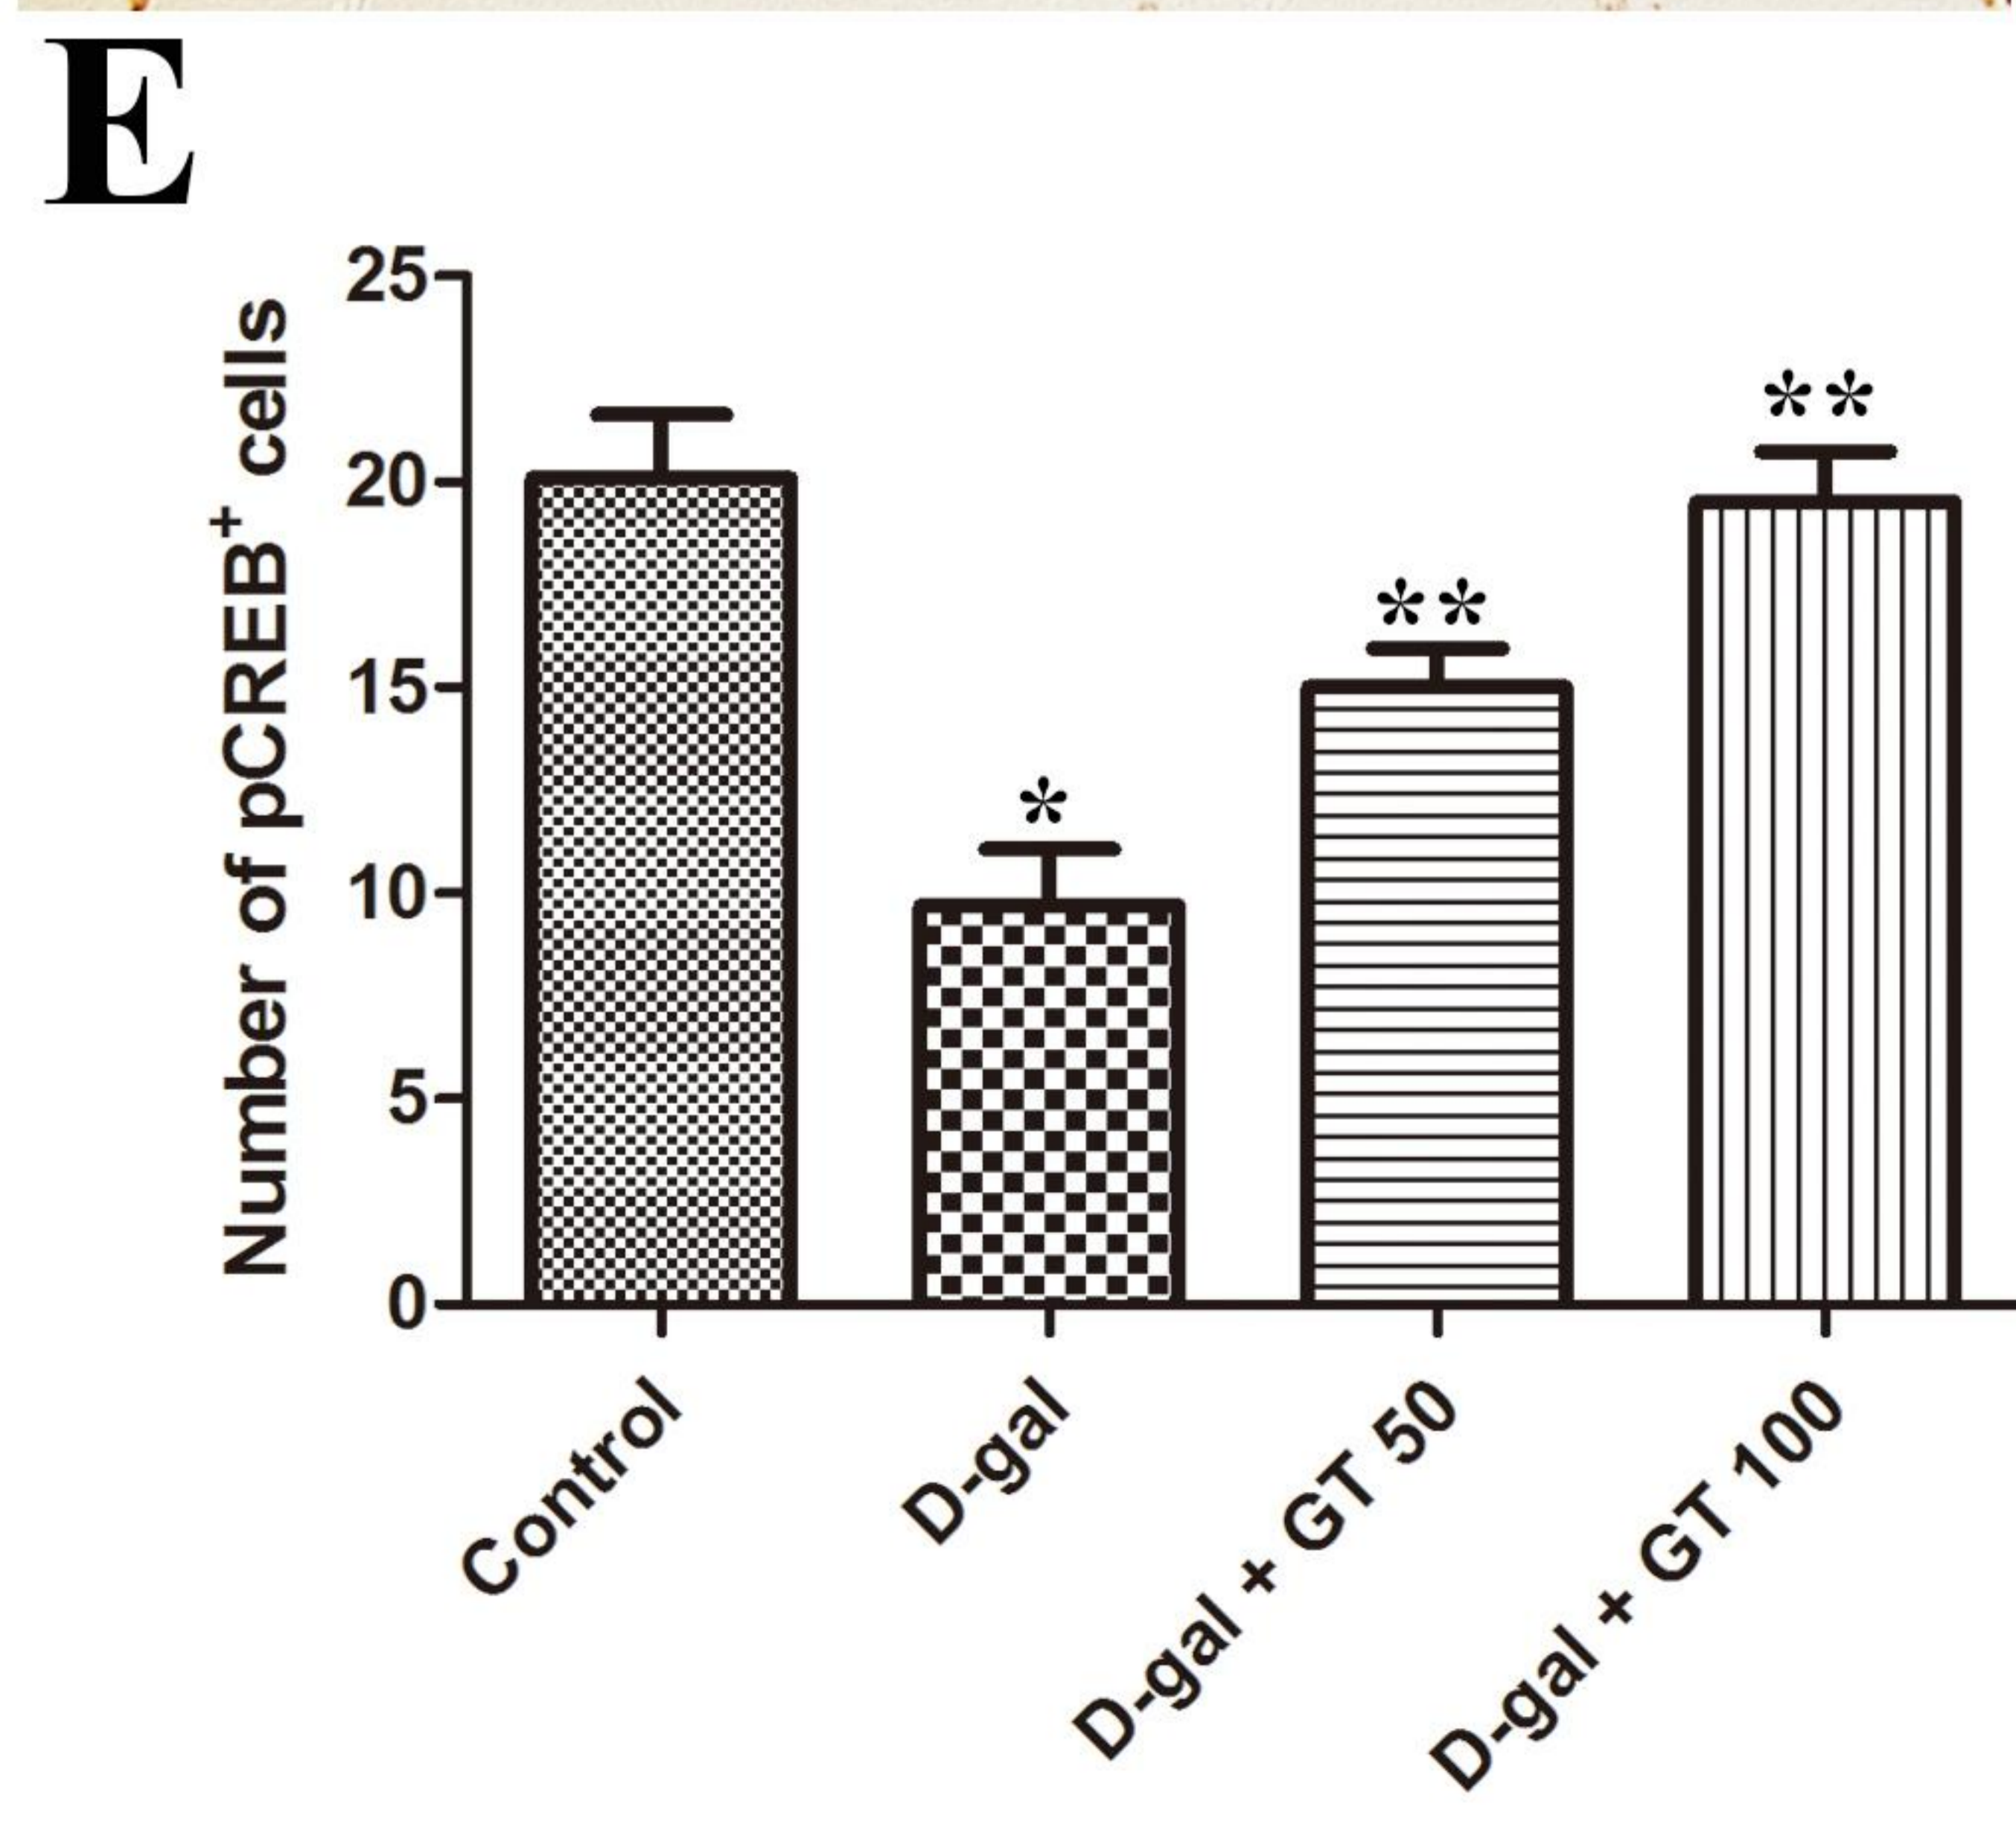

Supplement: Supplementary file 1 [file 1 › GER491113_sm4.PDF]

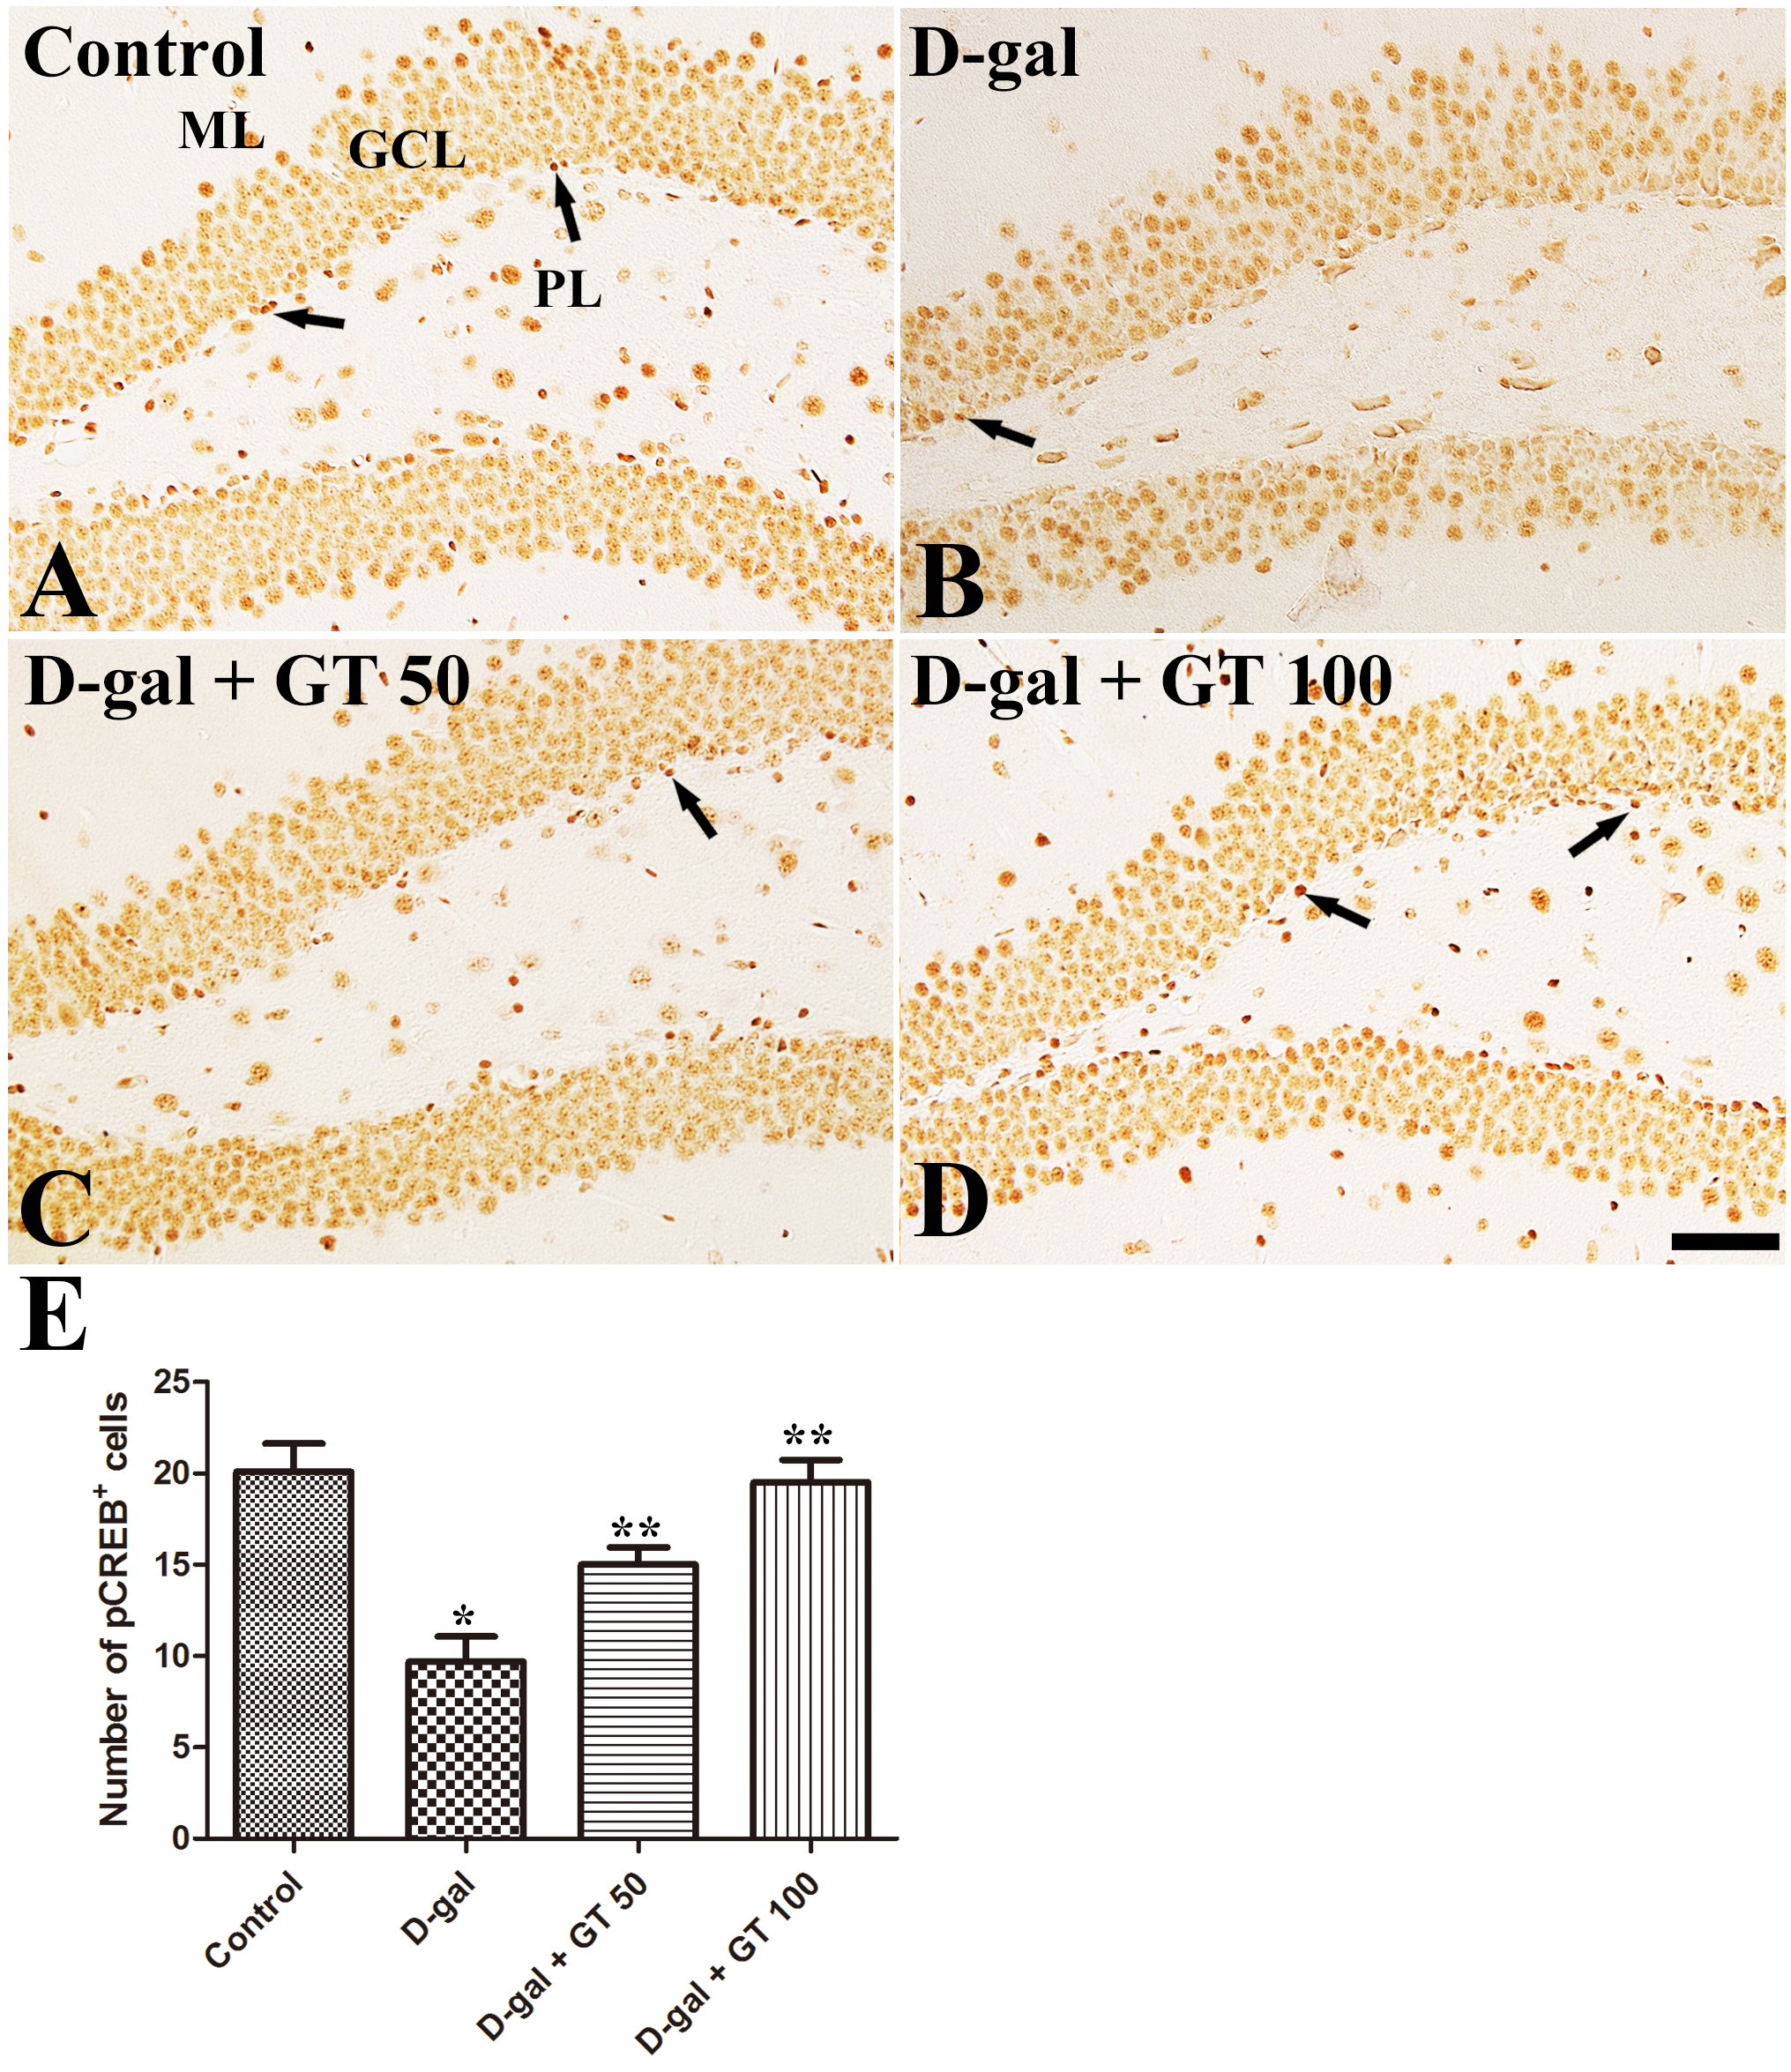

Supplement: Supplementary file 1 [file 1 › GER491113_sm4.jpg]

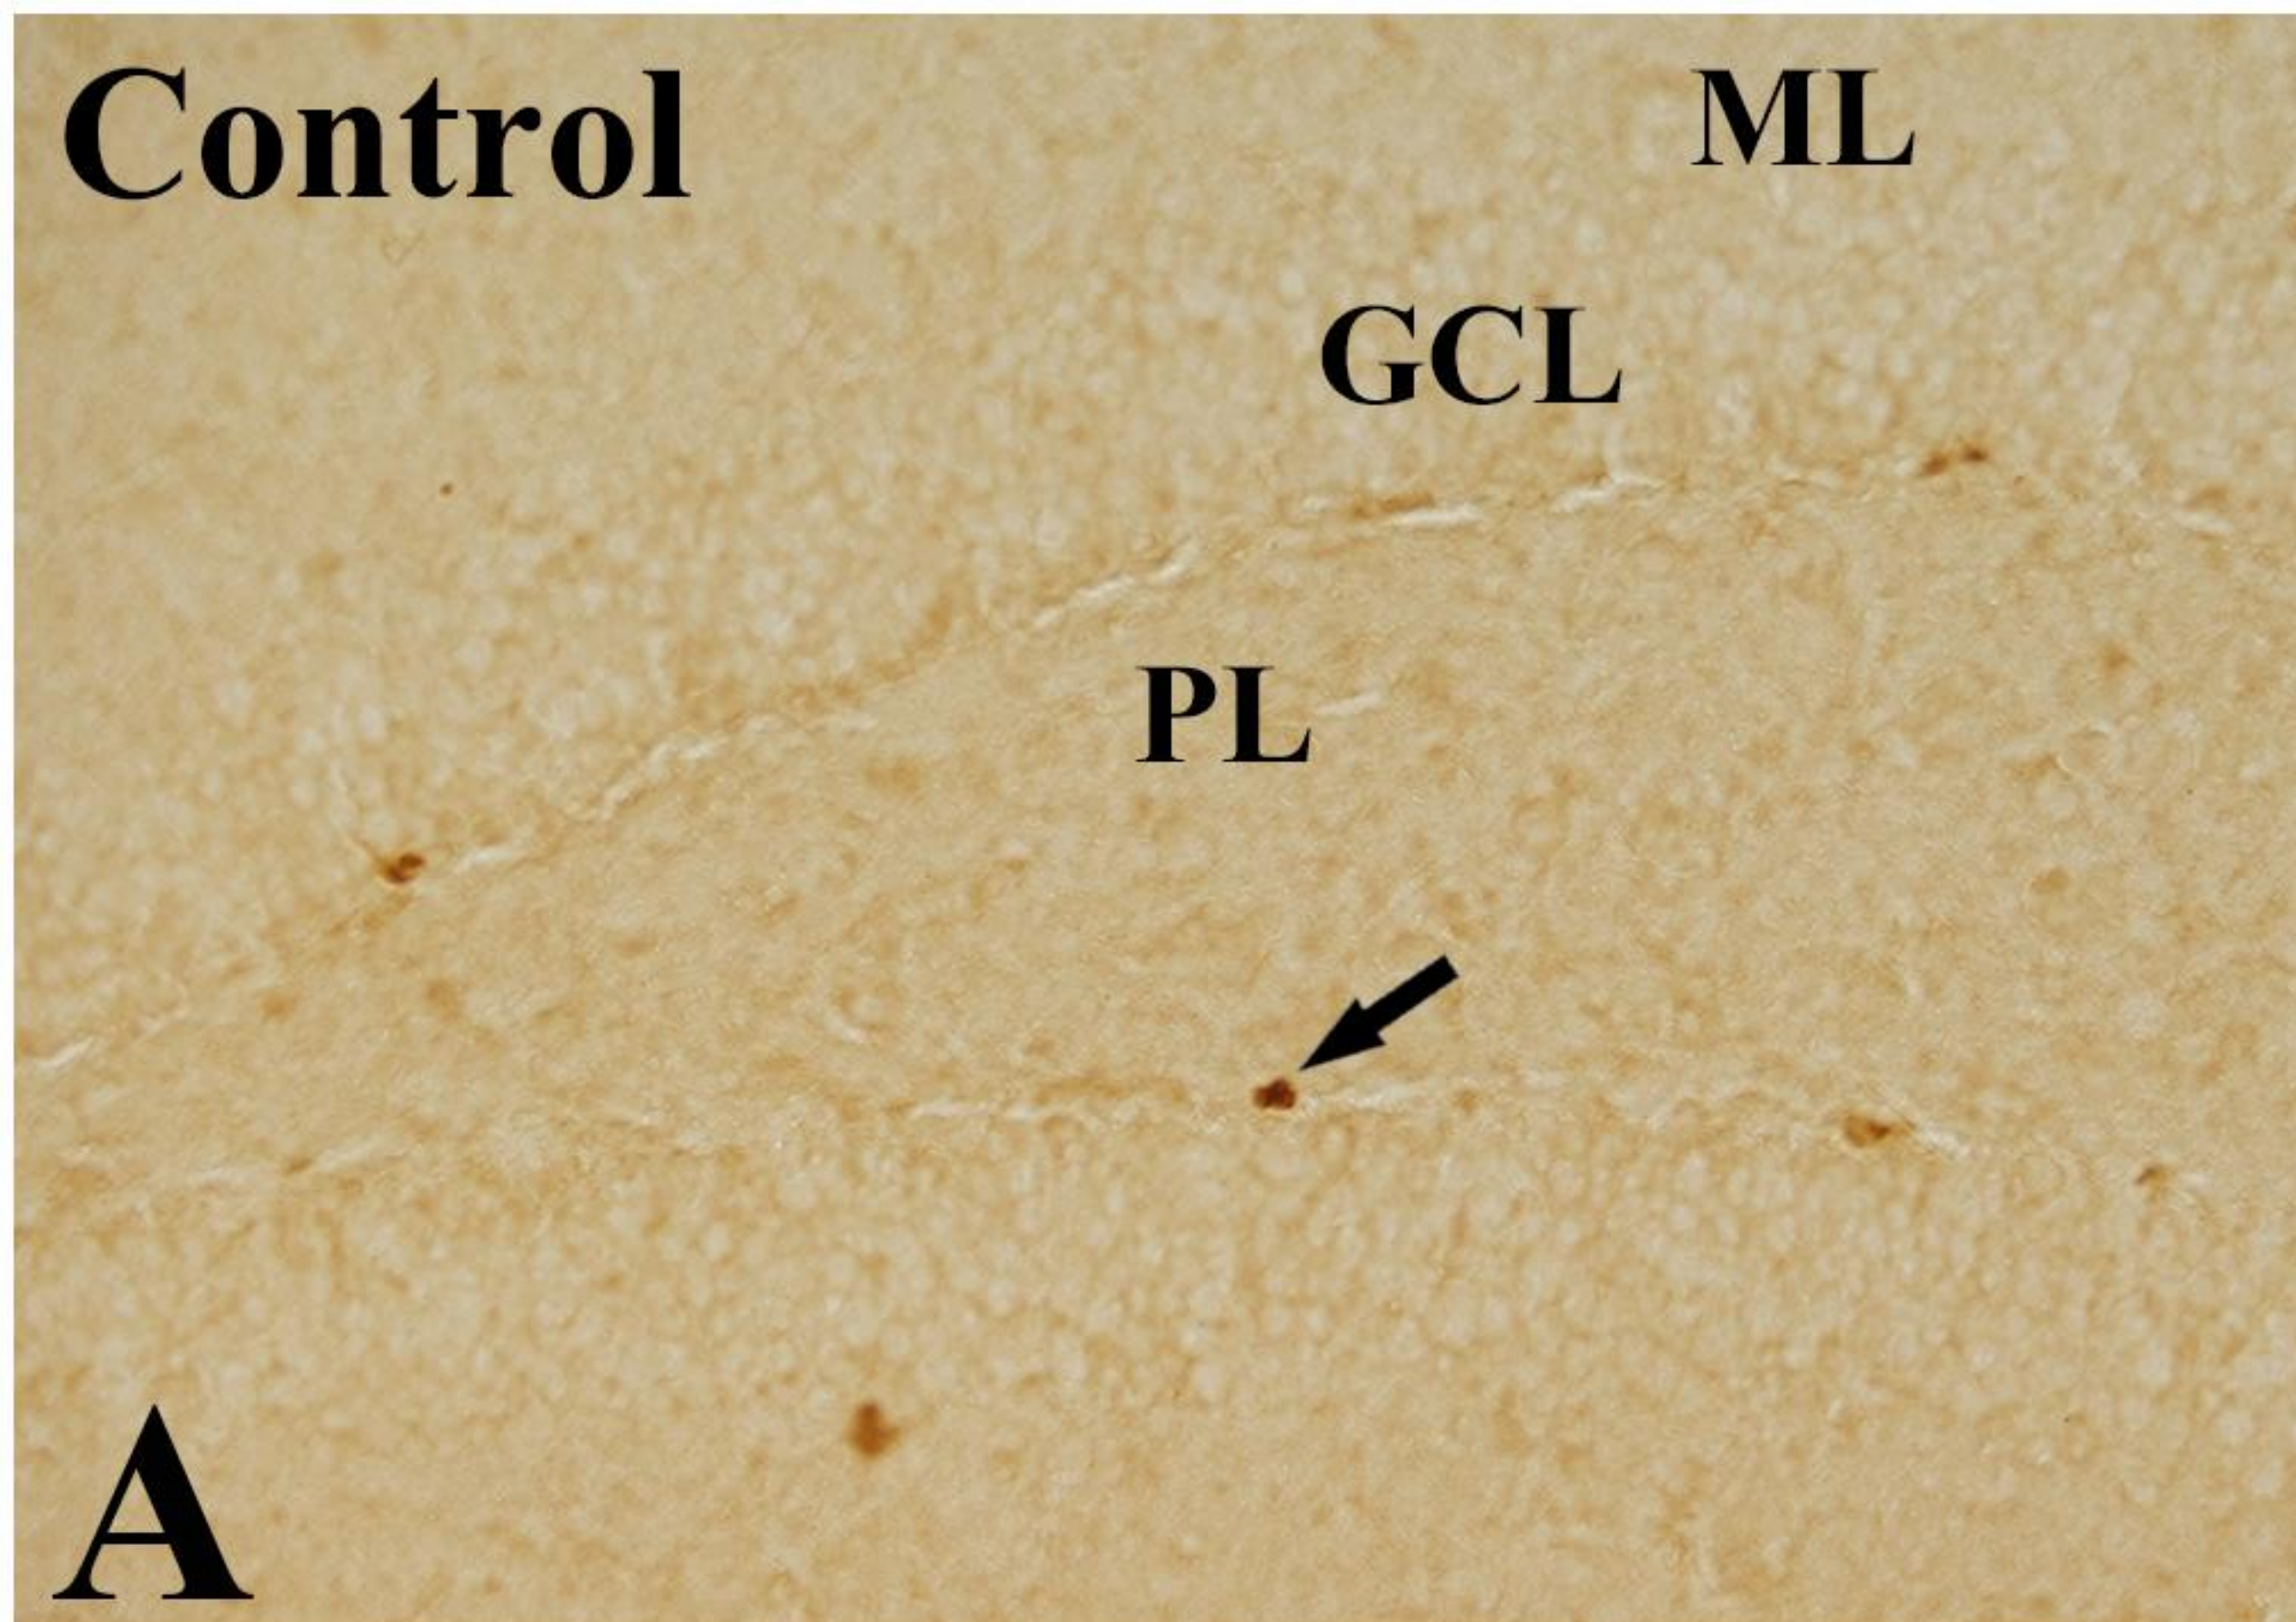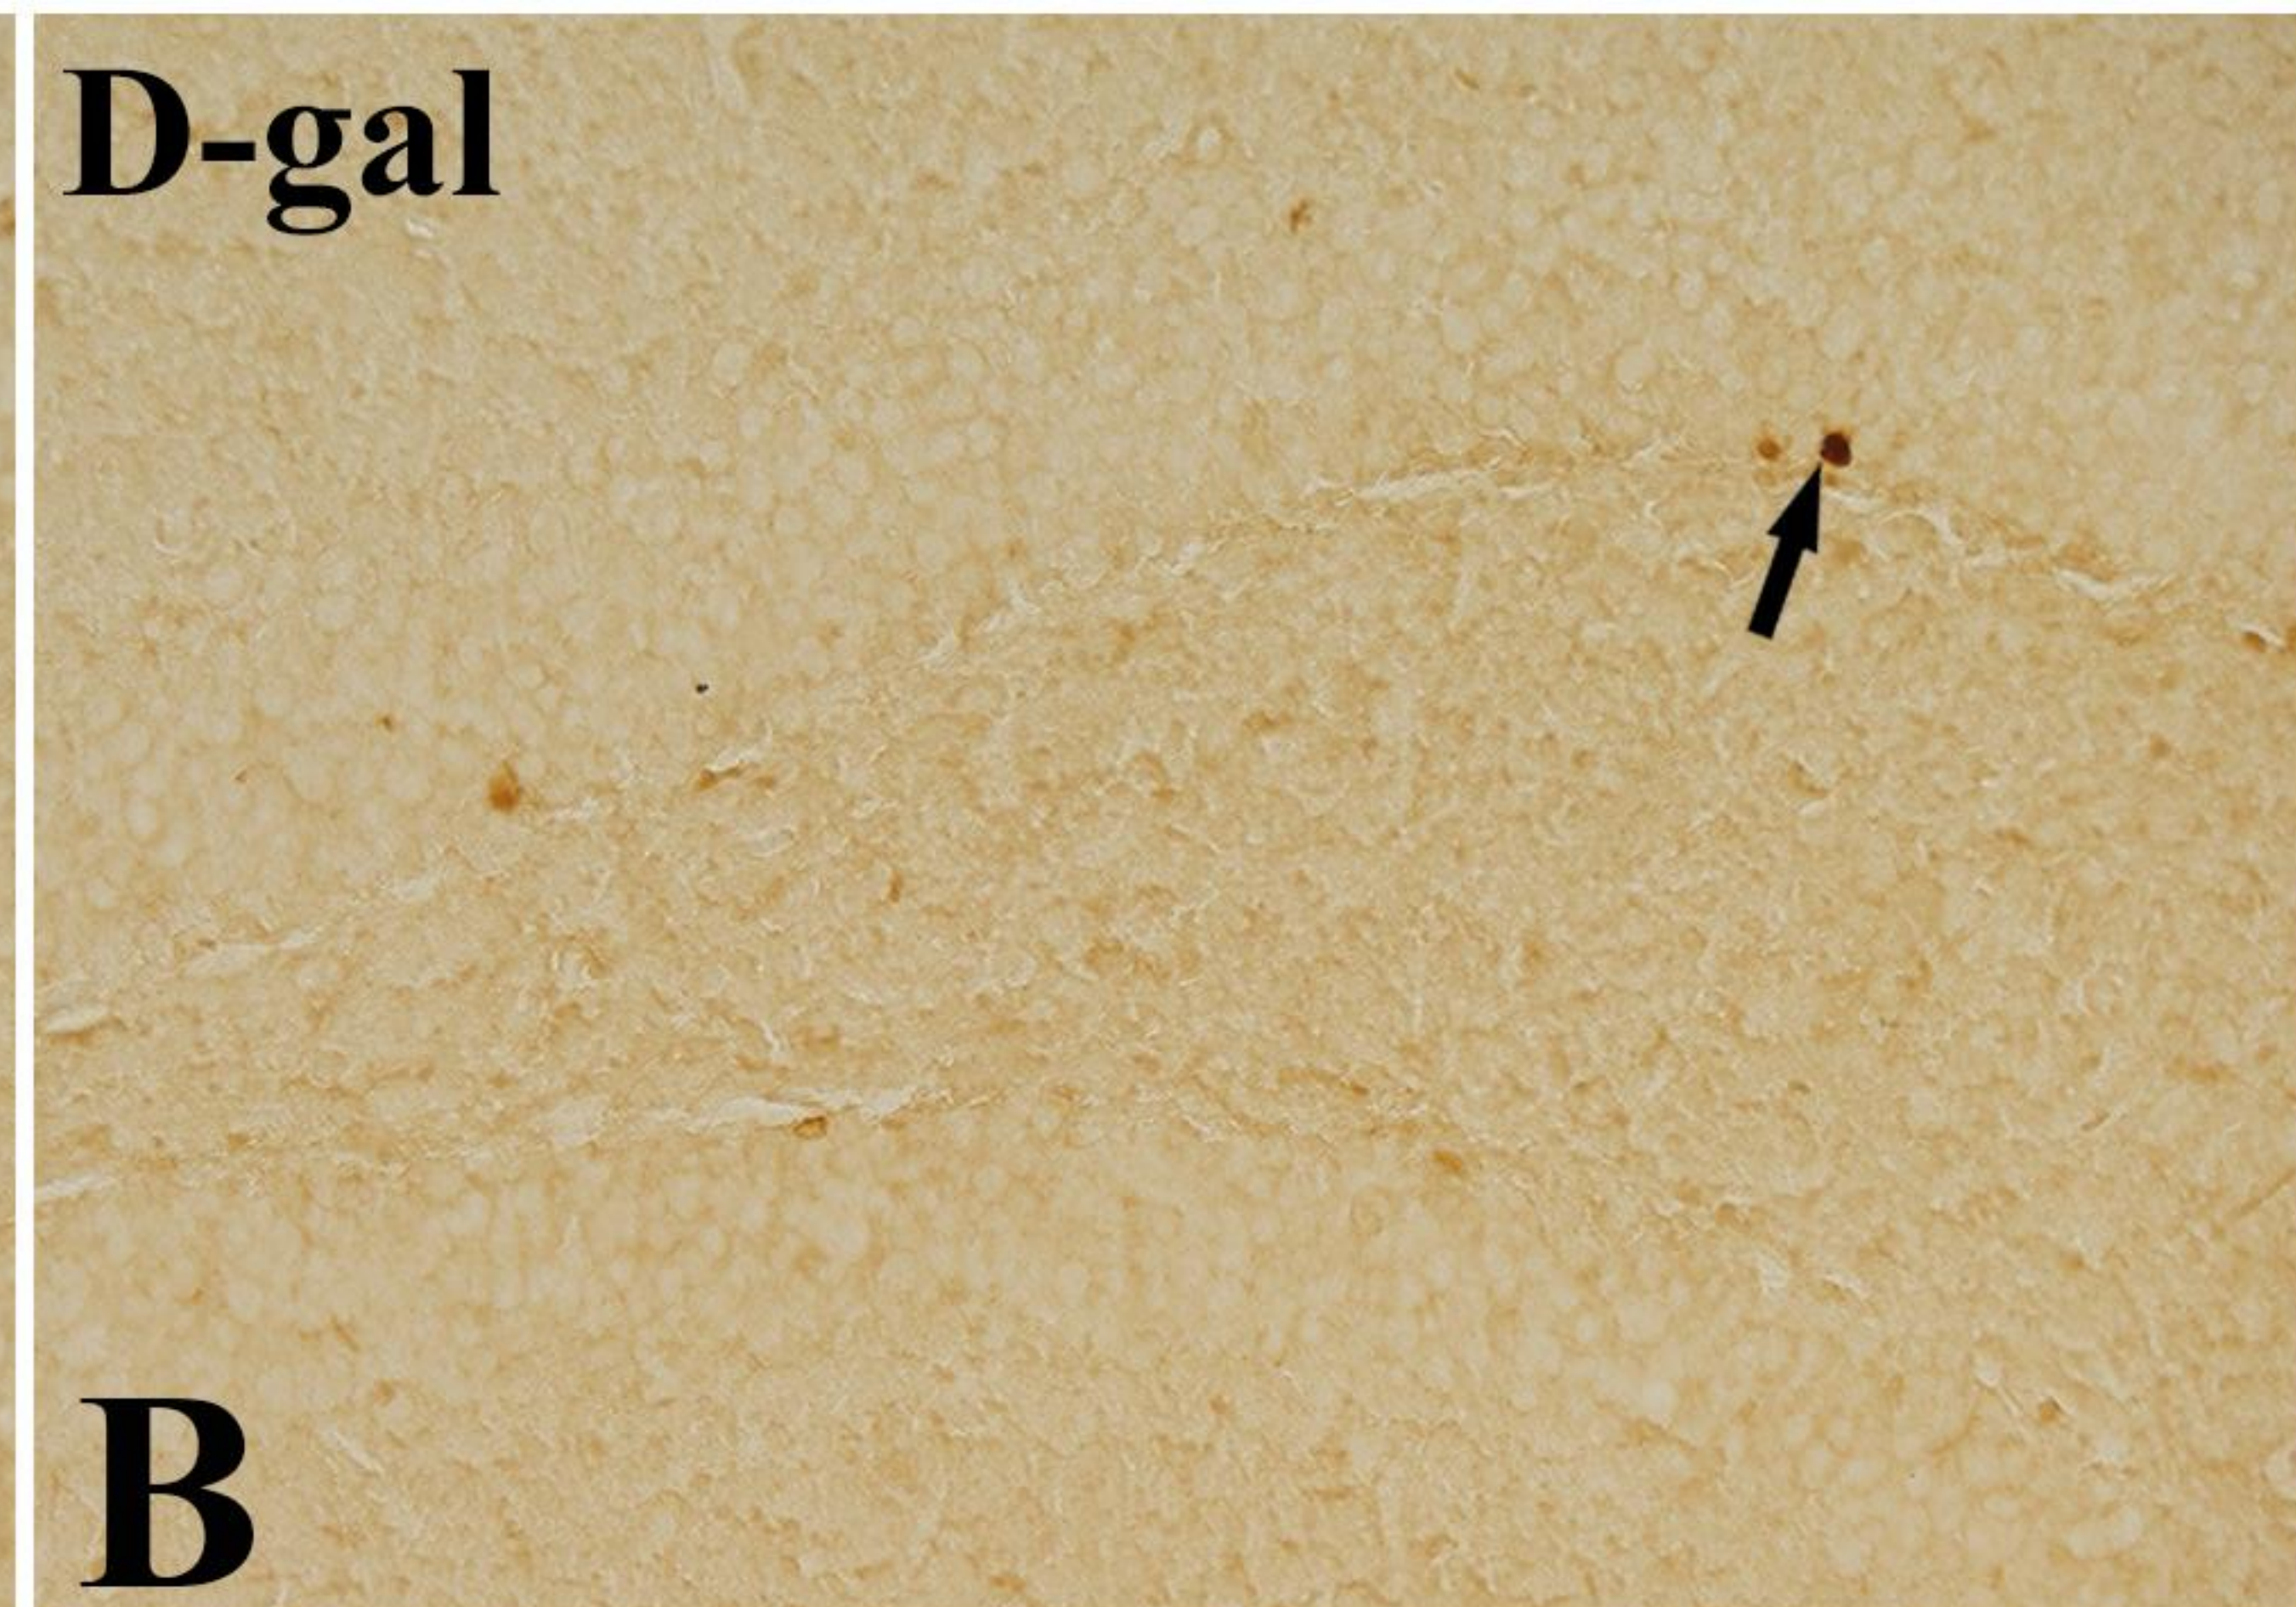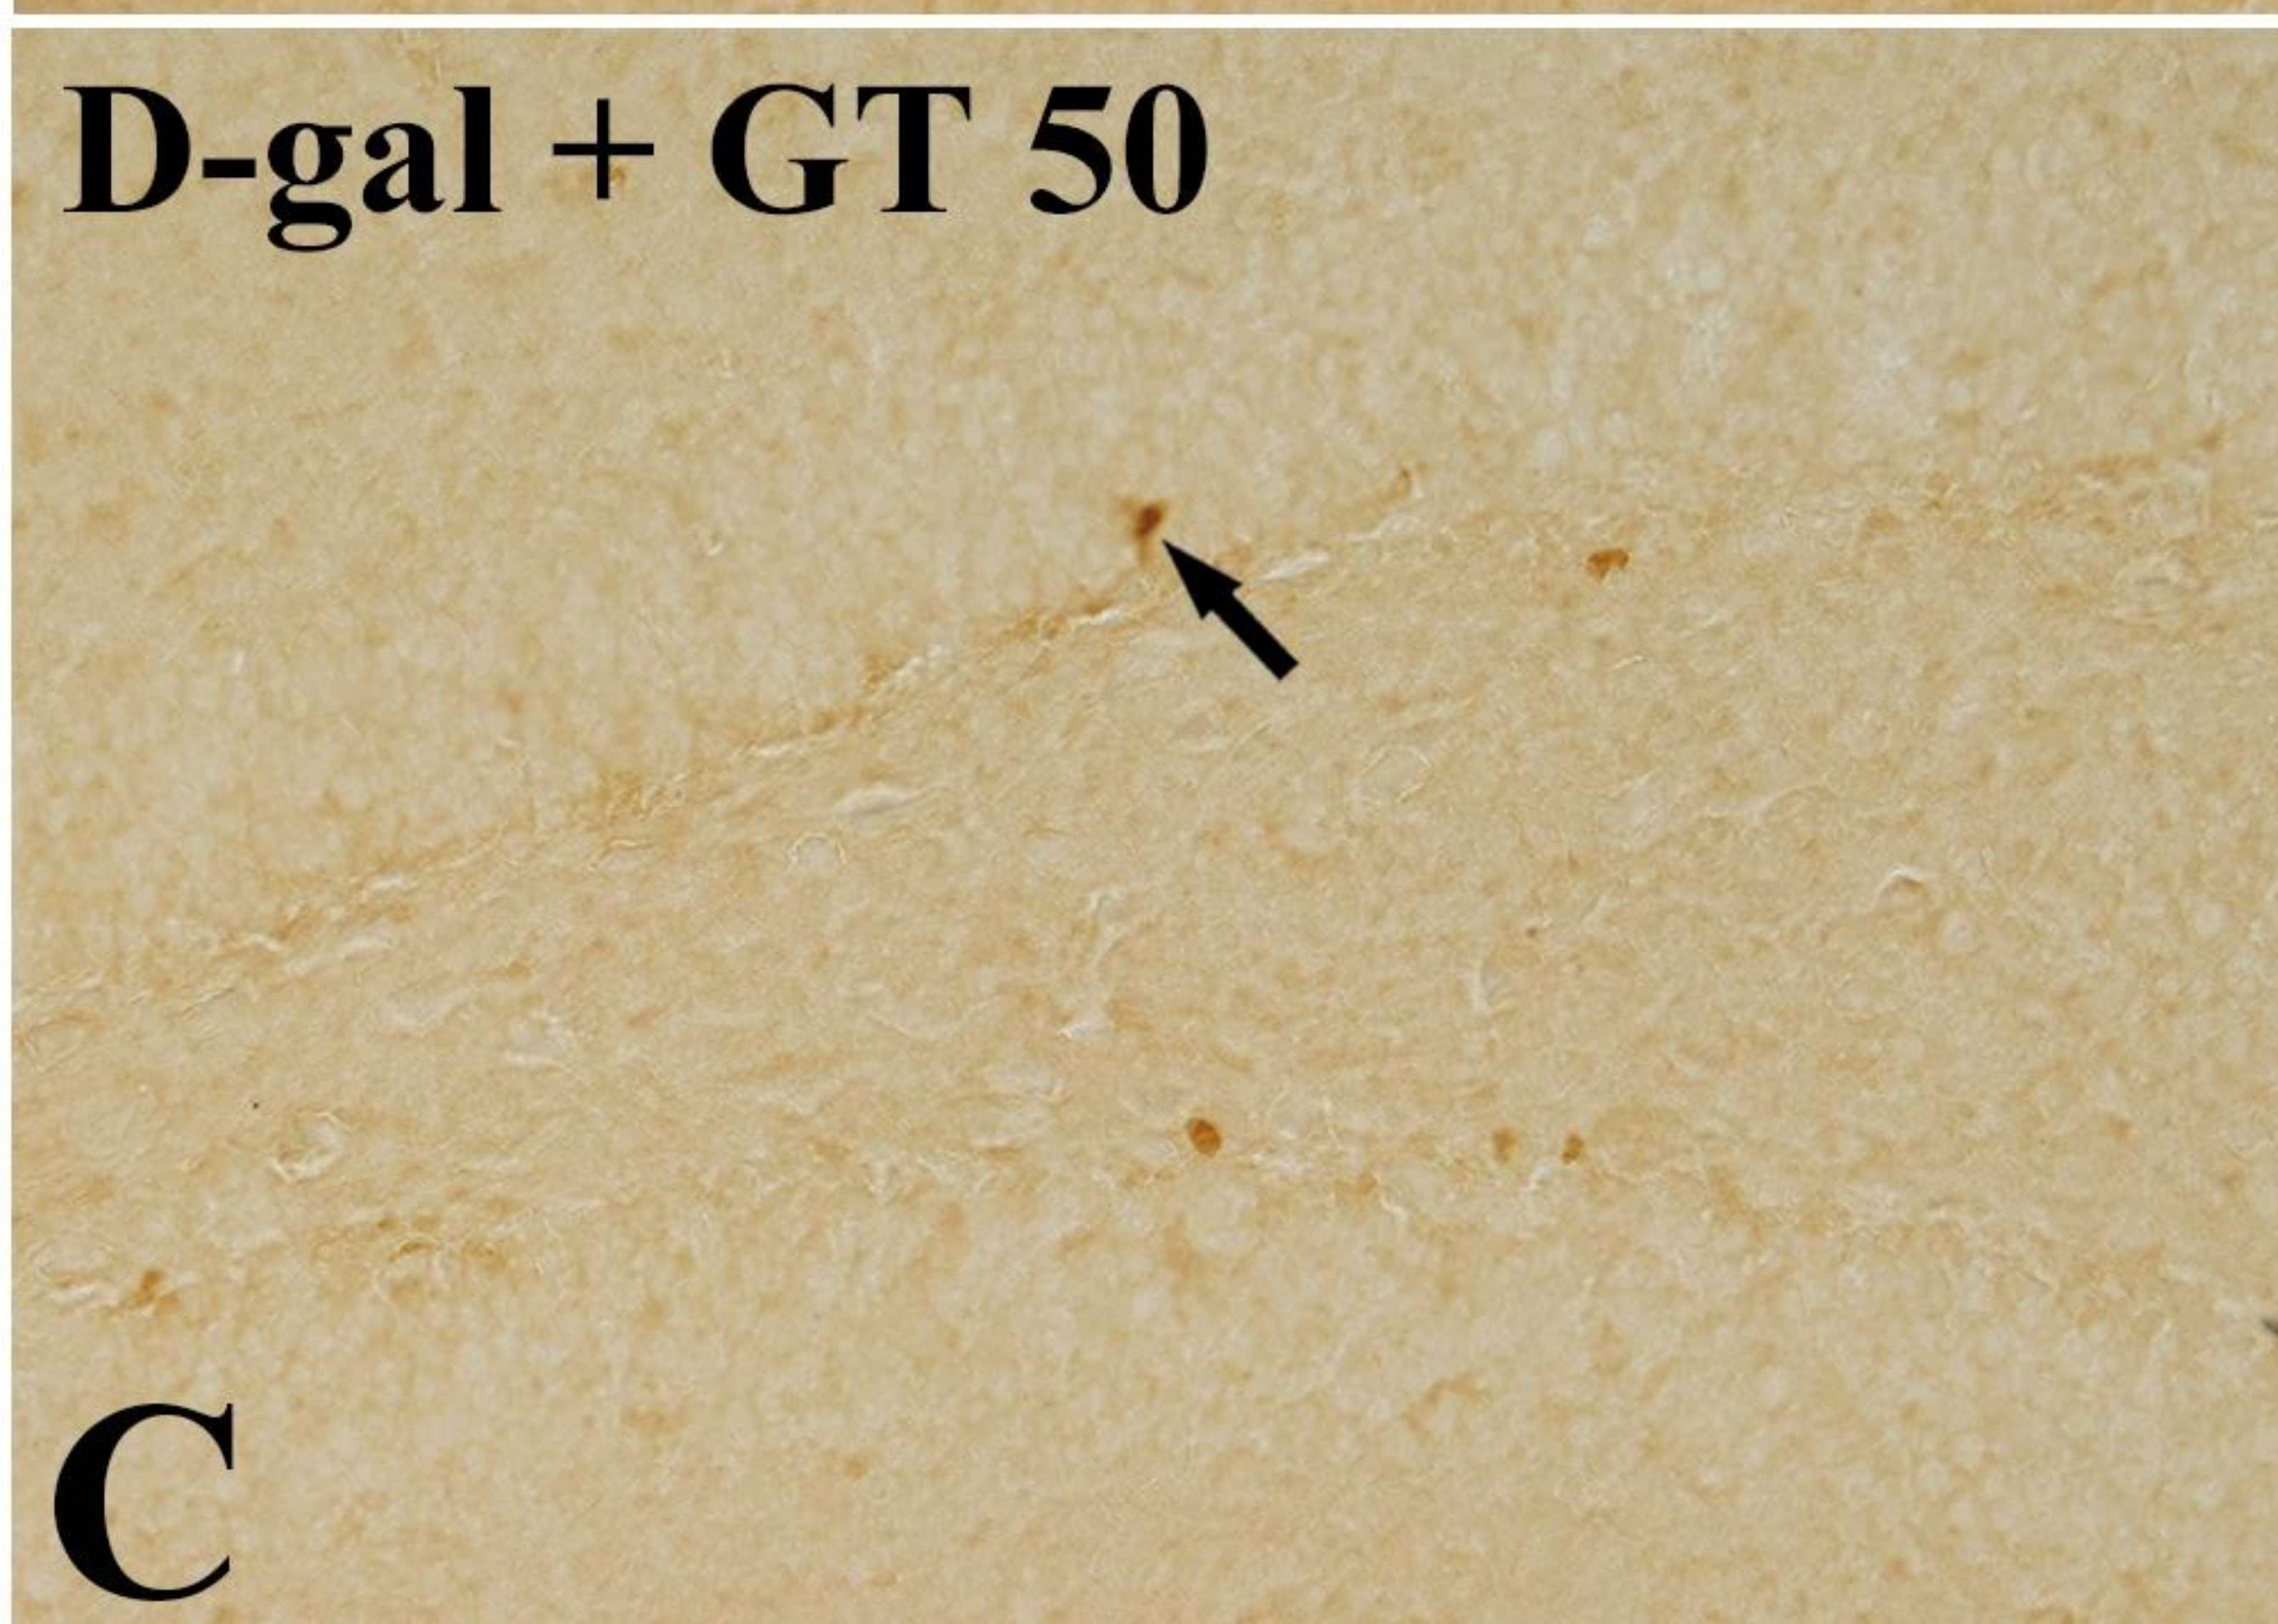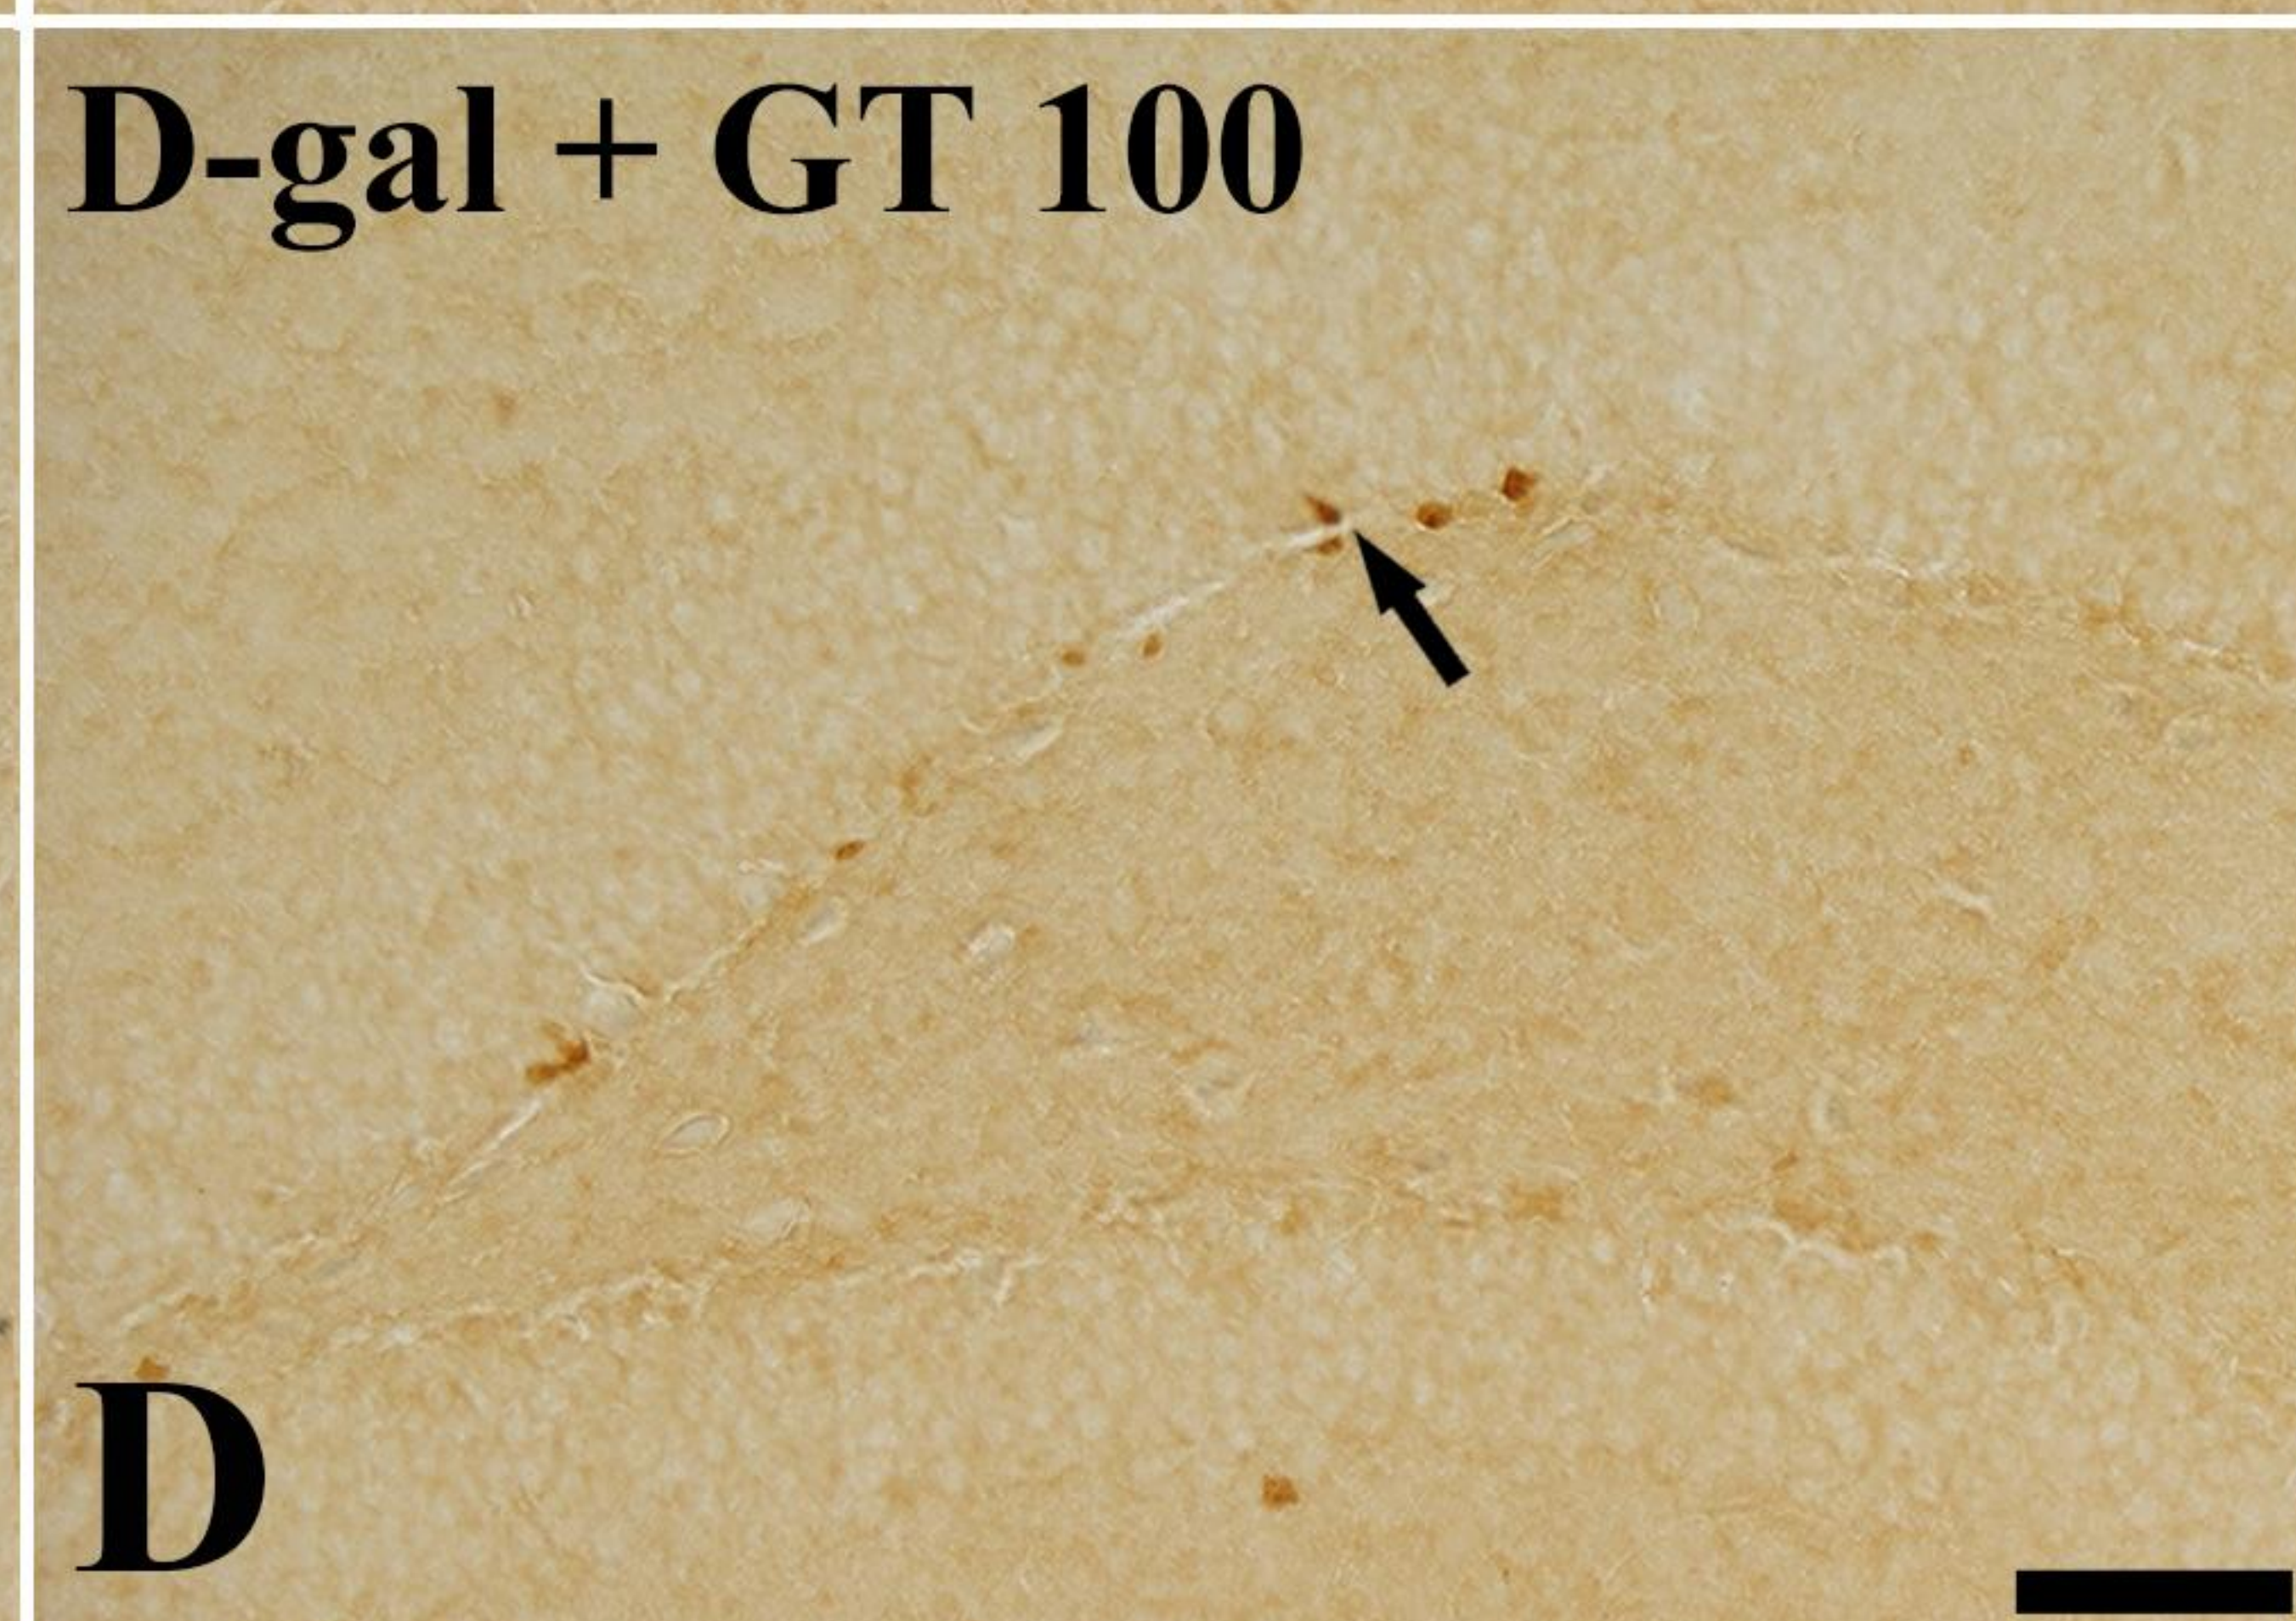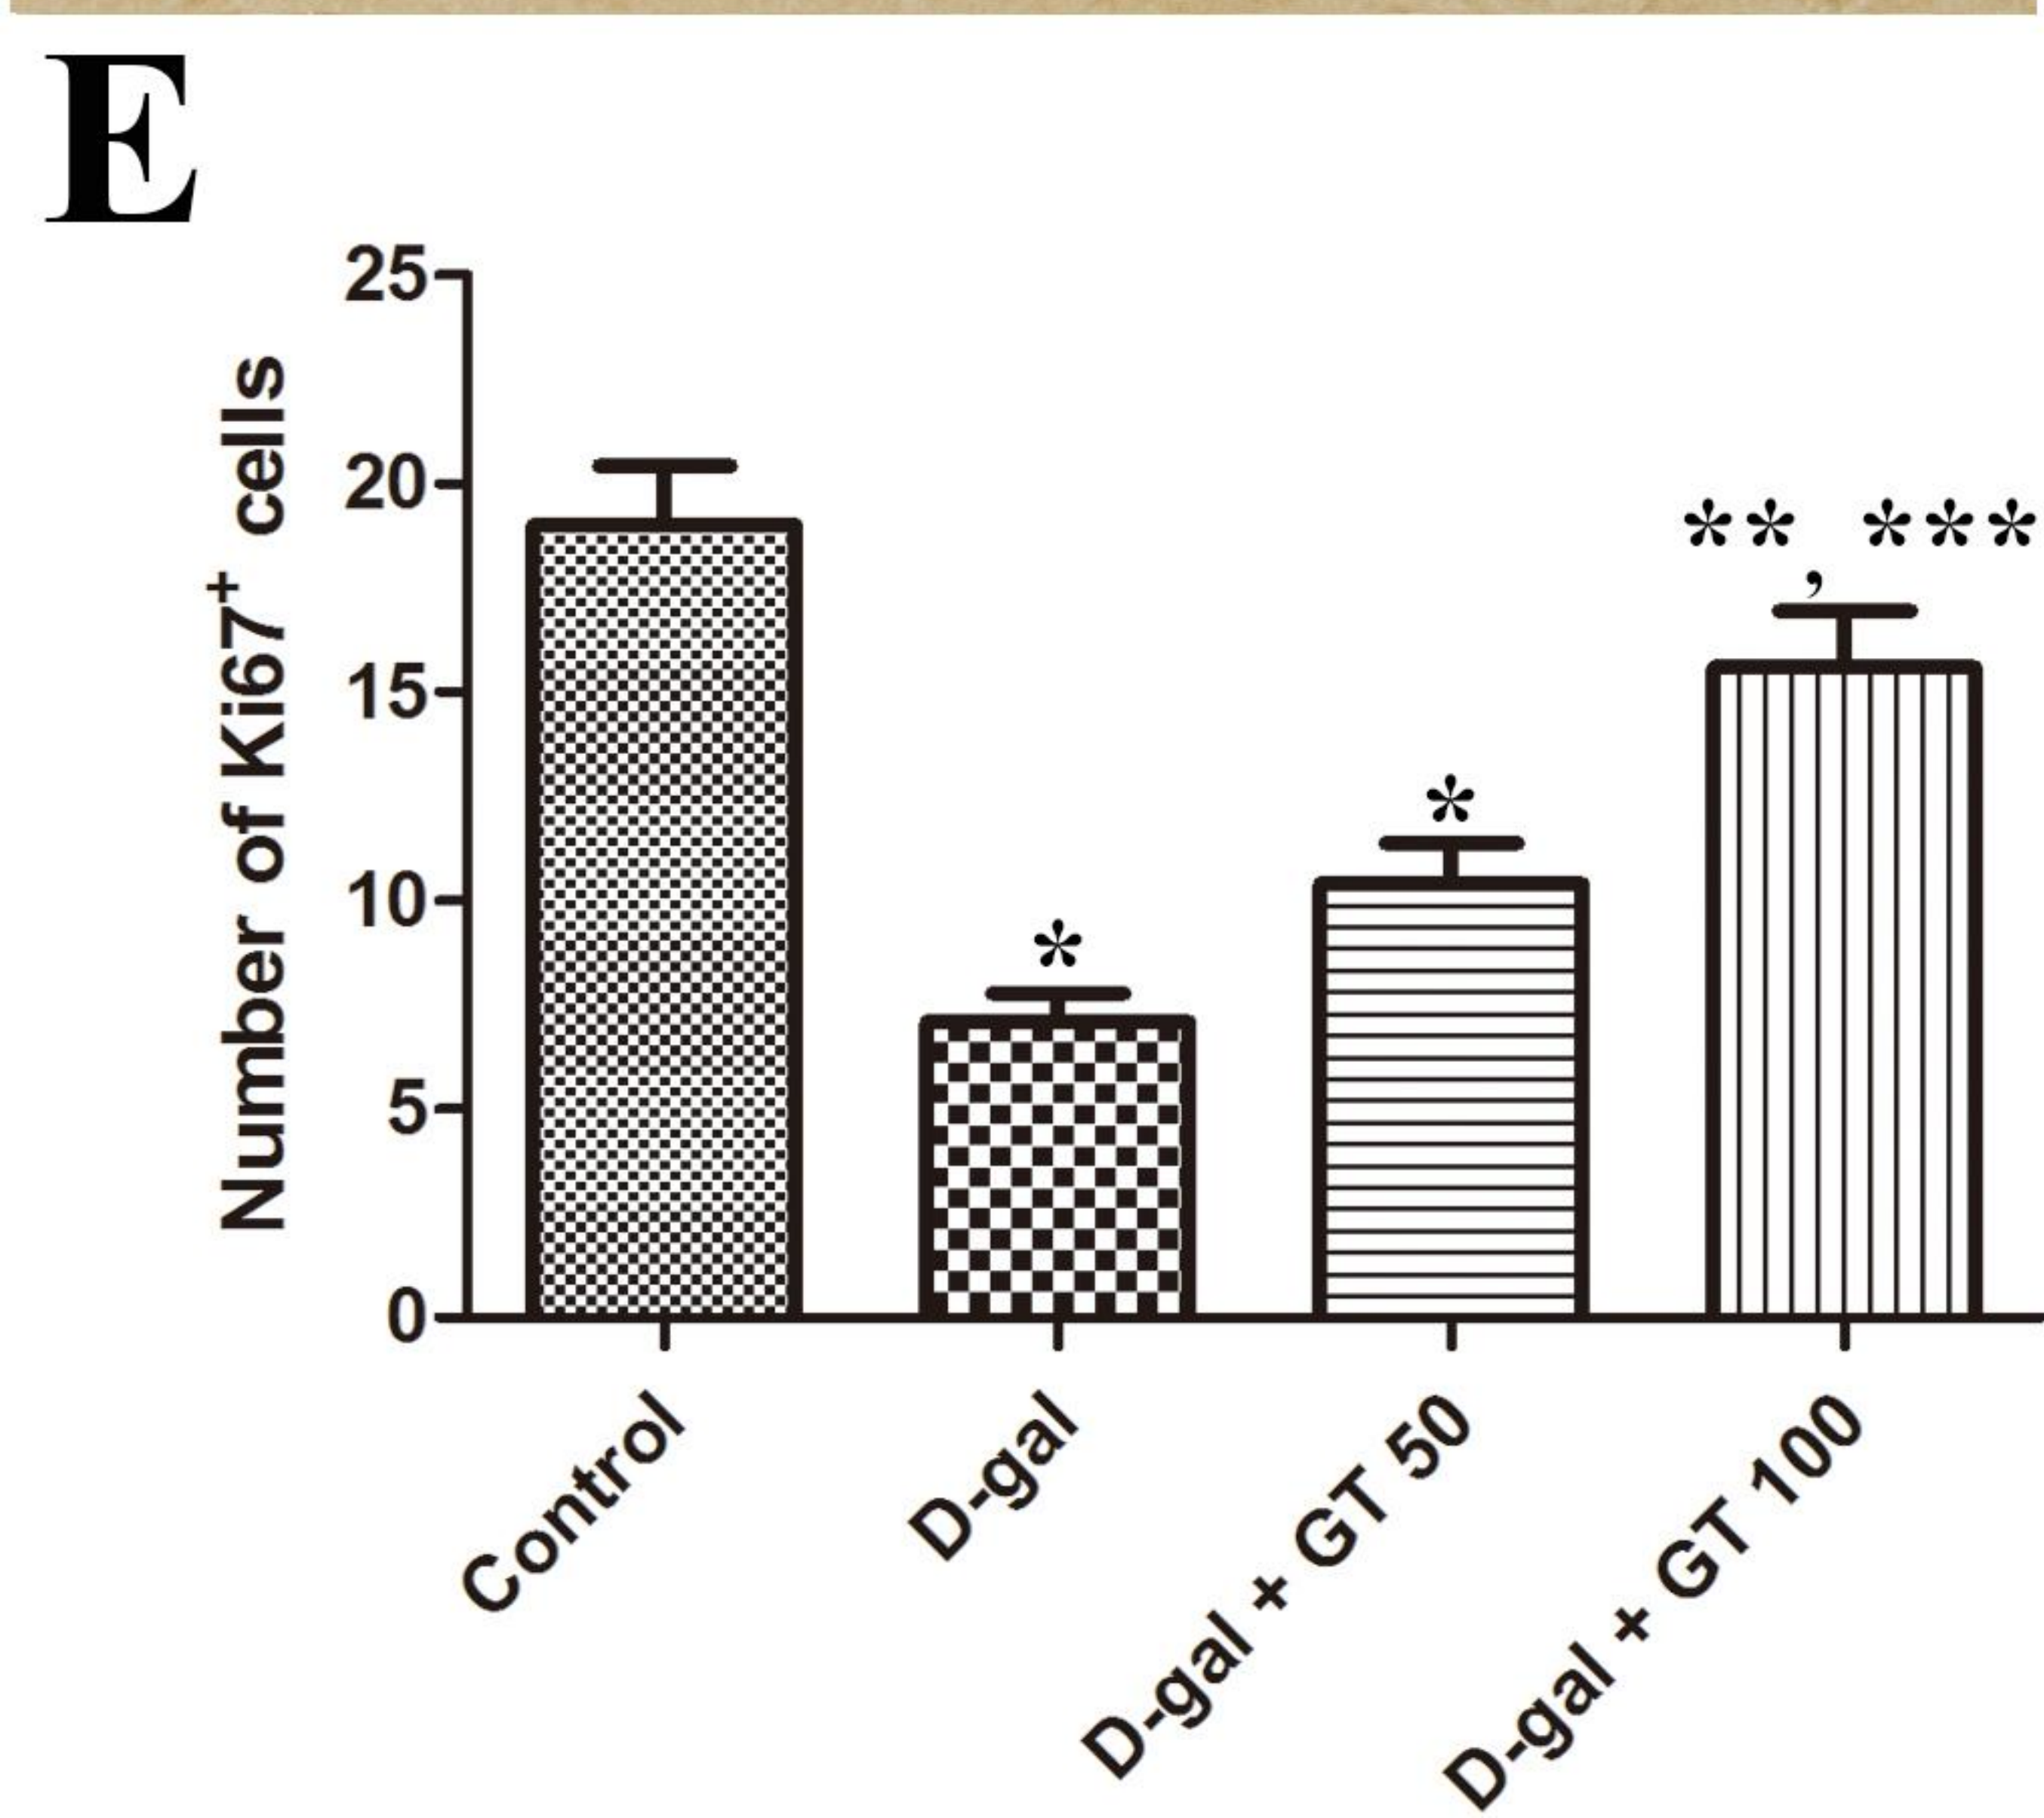

Supplement: Supplementary file 1 [file 1 › GER491113_sm3.PDF]

A

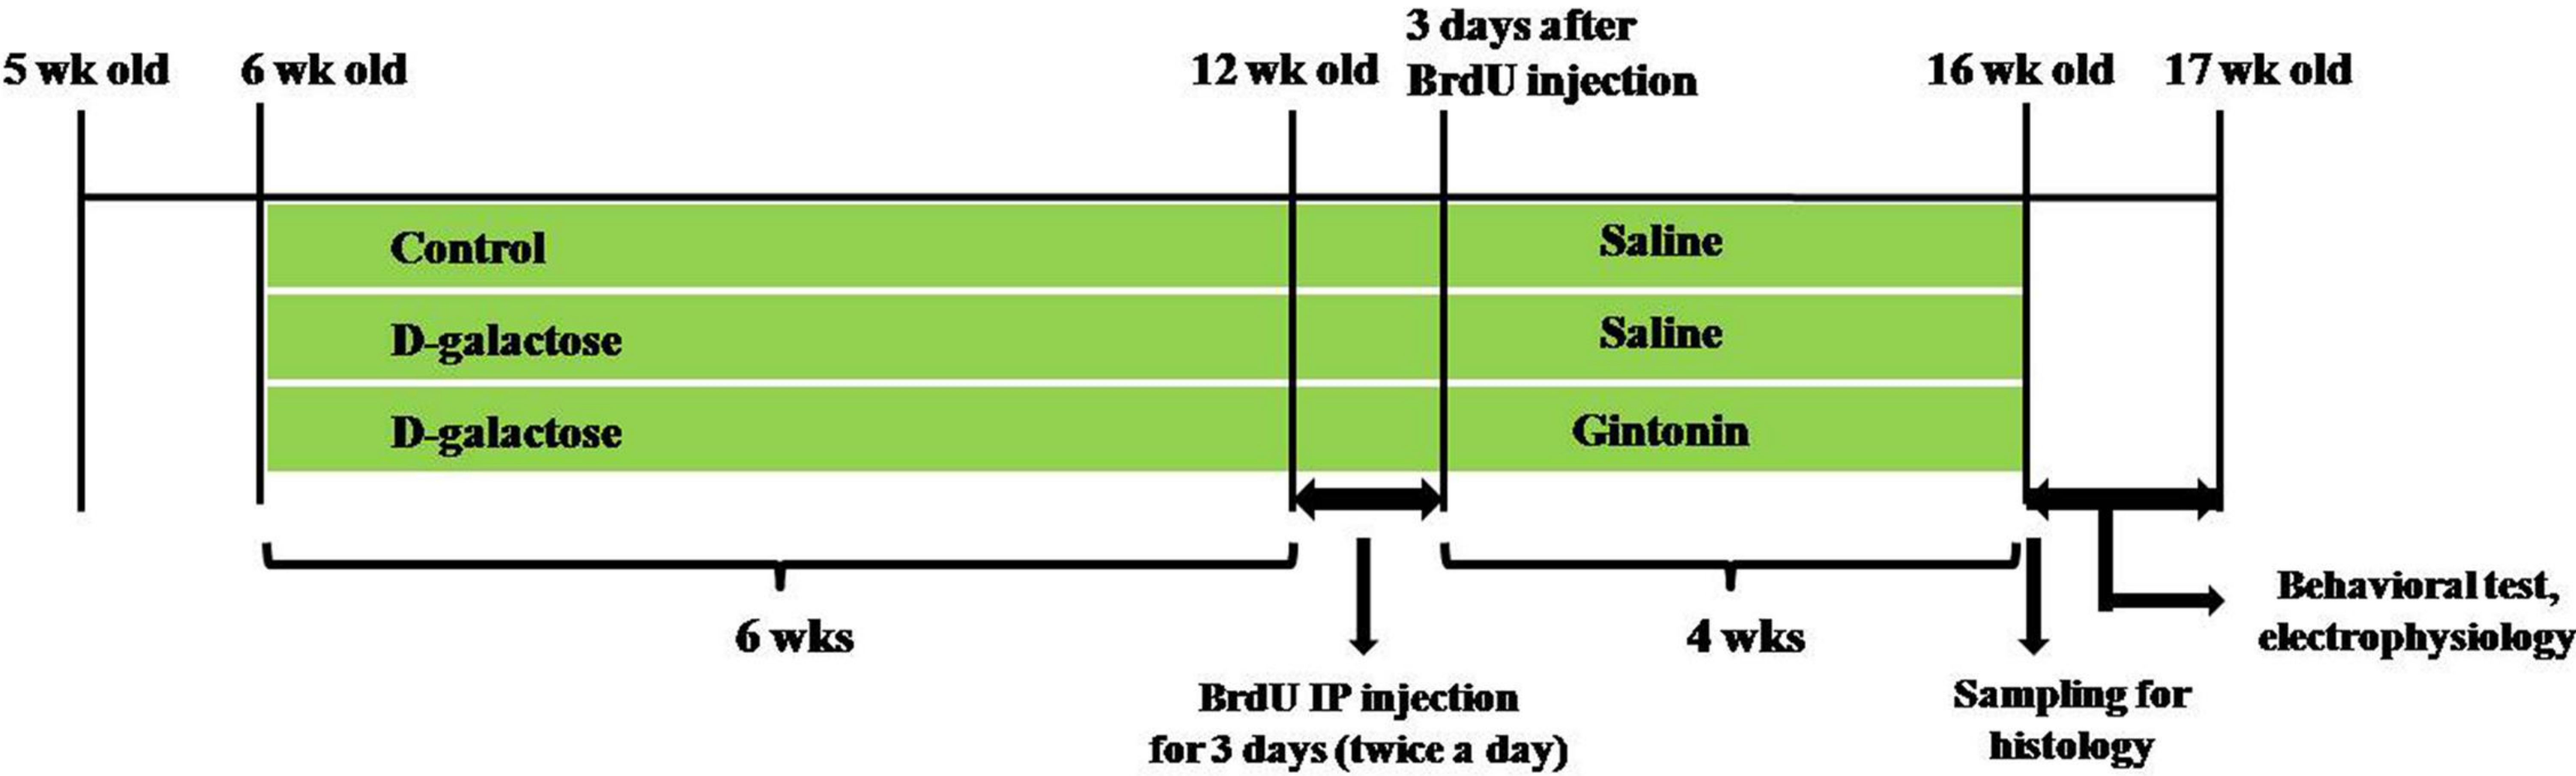

B

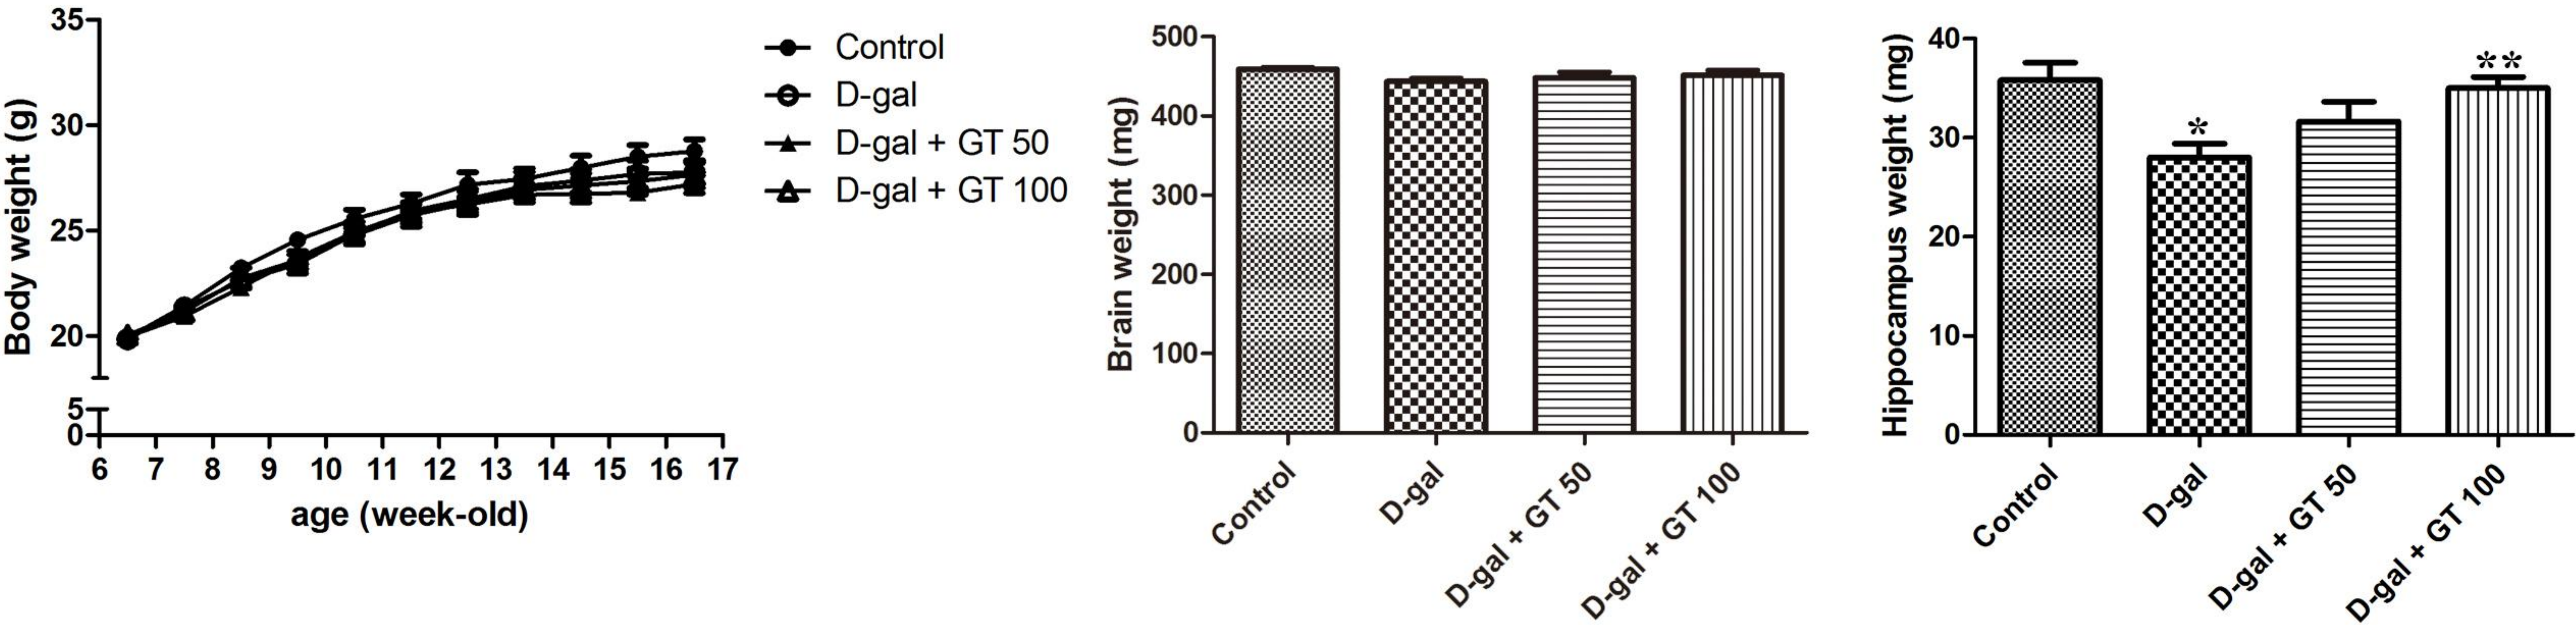

Supplement: Supplementary file 1 [file 1 › GER491113_sm1.PDF]

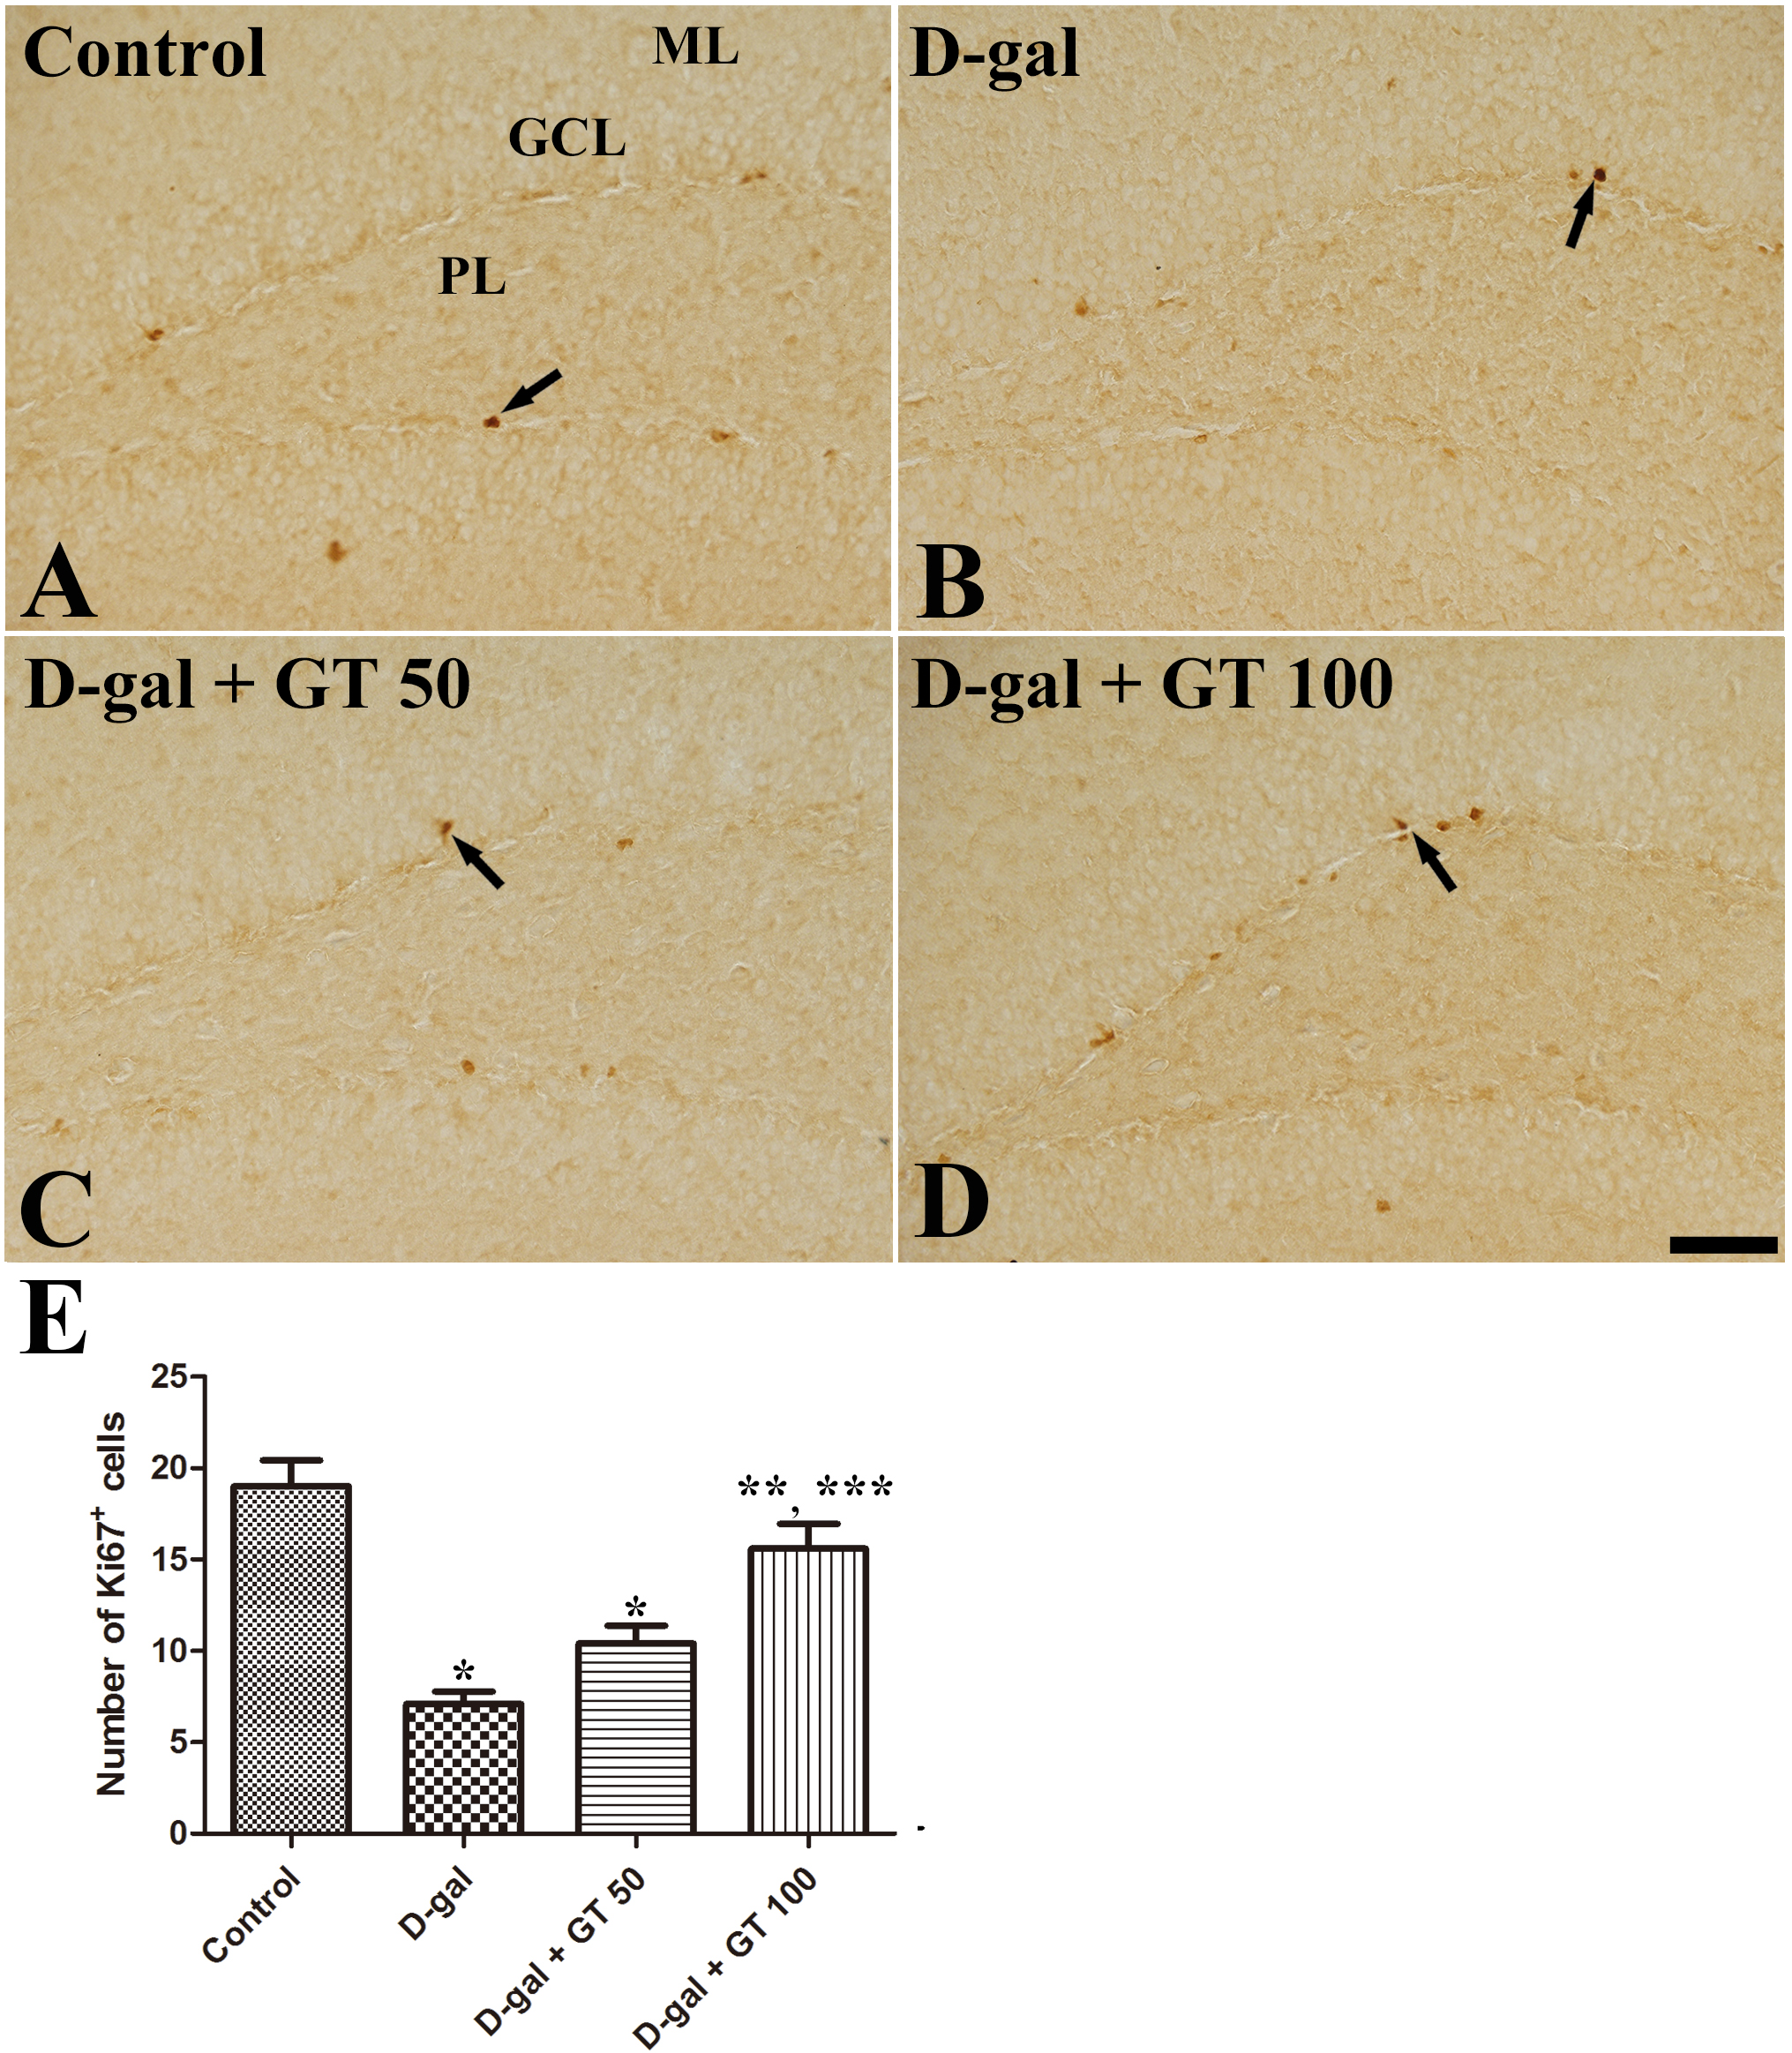

Supplement: Supplementary file 1 [file 1 › GER491113_sm3.jpg]

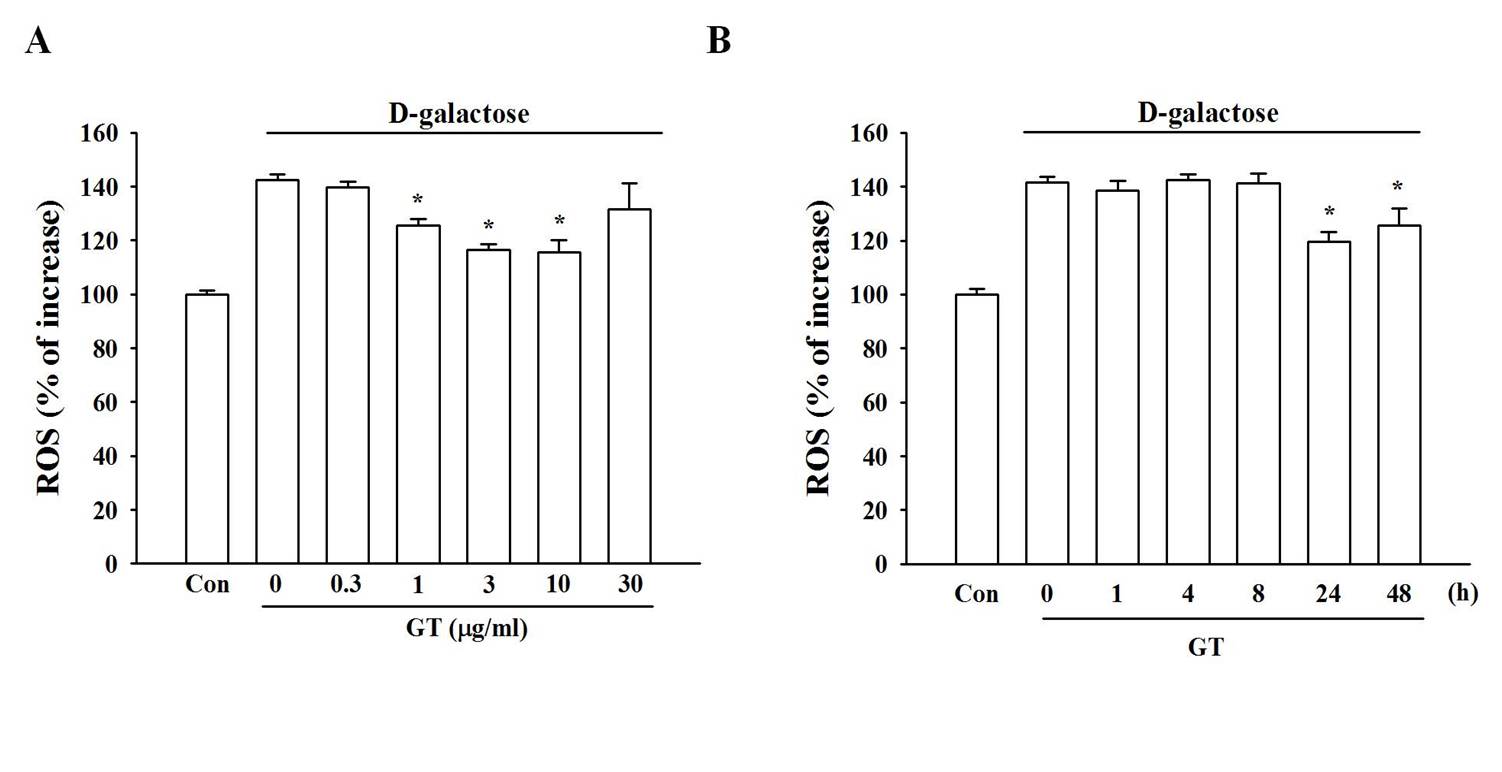

Supplement: Supplementary file 1 [file 1 › GER491113_sm8.jpg]
